# Supplementary material
Source: PubMed Central journal article supplement (PMC5926944)
Supplement: jciinsight-3-99128-s002.pdf [file jciinsight-3-99128-s002.pdf]

## ICMJE Form for Disclosure of Potential Conflicts of Interest

### Instructions

The purpose of this form is to provide readers of your manuscript with information about your other interests that could influence how they receive and understand your work. The form is designed to be completed electronically and stored electronically. It contains programming that allows appropriate data display. Each author should submit a separate form and is responsible for the accuracy and completeness of the submitted information. The form is in six parts.

#### 1. Identifying information.

#### 2. The work under consideration for publication.

This section asks for information about the work that you have submitted for publication. The time frame for this reporting is that of the work itself, from the initial conception and planning to the present. The requested information is about resources that you received, either directly or indirectly (via your institution), to enable you to complete the work. Checking "No" means that you did the work without receiving any financial support from any third party -- that is, the work was supported by funds from the same institution that pays your salary and that institution did not receive third-party funds with which to pay you. If you or your institution received funds from a third party to support the work, such as a government granting agency, charitable foundation or commercial sponsor, check "Yes".

#### 3. Relevant financial activities outside the submitted work.

This section asks about your financial relationships with entities in the bio-medical arena that could be perceived to influence, or that give the appearance of potentially influencing, what you wrote in the submitted work. You should disclose interactions with ANY entity that could be considered broadly relevant to the work. For example, if your article is about testing an epidermal growth factor receptor (EGFR) antagonist in lung cancer, you should report all associations with entities pursuing diagnostic or therapeutic strategies in cancer in general, not just in the area of EGFR or lung cancer.

Report all sources of revenue paid (or promised to be paid) directly to you or your institution on your behalf over the 36 months prior to submission of the work. This should include all monies from sources with relevance to the submitted work, not just monies from the entity that sponsored the research. Please note that your interactions with the work's sponsor that are outside the submitted work should also be listed here. If there is any question, it is usually better to disclose a relationship than not to do so.

For grants you have received for work outside the submitted work, you should disclose support ONLY from entities that could be perceived to be affected financially by the published work, such as drug companies, or foundations supported by entities that could be perceived to have a financial stake in the outcome. Public funding sources, such as government agencies, charitable foundations or academic institutions, need not be disclosed. For example, if a government agency sponsored a study in which you have been involved and drugs were provided by a pharmaceutical company, you need only list the pharmaceutical company.

#### 4. Intellectual Property.

This section asks about patents and copyrights, whether pending, issued, licensed and/or receiving royalties.

#### 5. Relationships not covered above.

Use this section to report other relationships or activities that readers could perceive to have influenced, or that give the appearance of potentially influencing, what you wrote in the submitted work.

#### Definitions.

**Entity:** government agency, foundation, commercial sponsor, academic institution, etc.

**Grant:** A grant from an entity, generally [but not always] paid to your organization

**Personal Fees:** Monies paid to you for services rendered, generally honoraria, royalties, or fees for consulting, lectures, speakers bureaus, expert testimony, employment, or other affiliations

**Non-Financial Support:** Examples include drugs/equipment supplied by the entity, travel paid by the entity, writing assistance, administrative support, etc.

**Other:** Anything not covered under the previous three boxes

**Pending:** The patent has been filed but not issued

**Issued:** The patent has been issued by the agency

**Licensed:** The patent has been licensed to an entity, whether earning royalties or not

**Royalties:** Funds are coming in to you or your institution due to your patent

## ICMJJE Form for Disclosure of Potential Conflicts of Interest

### Section 1. Identifying Information

|                                                                                                                 |                                                                     |                                               |
|-----------------------------------------------------------------------------------------------------------------|---------------------------------------------------------------------|-----------------------------------------------|
| 1. Given Name (First Name)<br>Shruti                                                                            | 2. Surname (Last Name)<br>Chaturvedi                                | 3. Date<br>01-February-2018                   |
| 4. Are you the corresponding author?                                                                            | <input type="checkbox"/> Yes <input checked="" type="checkbox"/> No | Corresponding Author's Name<br>Robert Brodsky |
| 5. Manuscript Title<br>Germline mutations in the alternative pathway of complement predispose to HELLP syndrome |                                                                     |                                               |
| 6. Manuscript Identifying Number (if you know it)<br>99128-INS-CMED-RV-3                                        |                                                                     |                                               |

### Section 2. The Work Under Consideration for Publication

Did you or your institution **at any time** receive payment or services from a third party (government, commercial, private foundation, etc.) for any aspect of the submitted work (including but not limited to grants, data monitoring board, study design, manuscript preparation, statistical analysis, etc.)?

Are there any relevant conflicts of interest?  Yes  No

### Section 3. Relevant financial activities outside the submitted work.

Place a check in the appropriate boxes in the table to indicate whether you have financial relationships (regardless of amount of compensation) with entities as described in the instructions. Use one line for each entity; add as many lines as you need by clicking the "Add +" box. You should report relationships that were **present during the 36 months prior to publication**.

Are there any relevant conflicts of interest?  Yes  No

### Section 4. Intellectual Property -- Patents & Copyrights

Do you have any patents, whether planned, pending or issued, broadly relevant to the work?  Yes  No

## ICMJE Form for Disclosure of Potential Conflicts of Interest

---

### Section 5. Relationships not covered above

Are there other relationships or activities that readers could perceive to have influenced, or that give the appearance of potentially influencing, what you wrote in the submitted work?

- Yes, the following relationships/conditions/circumstances are present (explain below):
- No other relationships/conditions/circumstances that present a potential conflict of interest

At the time of manuscript acceptance, journals will ask authors to confirm and, if necessary, update their disclosure statements. On occasion, journals may ask authors to disclose further information about reported relationships.

### Section 6. Disclosure Statement

Based on the above disclosures, this form will automatically generate a disclosure statement, which will appear in the box below.

Dr. Chaturvedi has nothing to disclose.

### Evaluation and Feedback

Please visit <http://www.icmje.org/cgi-bin/feedback> to provide feedback on your experience with completing this form.

## ICMJE Form for Disclosure of Potential Conflicts of Interest

### Instructions

The purpose of this form is to provide readers of your manuscript with information about your other interests that could influence how they receive and understand your work. The form is designed to be completed electronically and stored electronically. It contains programming that allows appropriate data display. Each author should submit a separate form and is responsible for the accuracy and completeness of the submitted information. The form is in six parts.

#### 1. Identifying information.

#### 2. The work under consideration for publication.

This section asks for information about the work that you have submitted for publication. The time frame for this reporting is that of the work itself, from the initial conception and planning to the present. The requested information is about resources that you received, either directly or indirectly (via your institution), to enable you to complete the work. Checking "No" means that you did the work without receiving any financial support from any third party -- that is, the work was supported by funds from the same institution that pays your salary and that institution did not receive third-party funds with which to pay you. If you or your institution received funds from a third party to support the work, such as a government granting agency, charitable foundation or commercial sponsor, check "Yes".

#### 3. Relevant financial activities outside the submitted work.

This section asks about your financial relationships with entities in the bio-medical arena that could be perceived to influence, or that give the appearance of potentially influencing, what you wrote in the submitted work. You should disclose interactions with ANY entity that could be considered broadly relevant to the work. For example, if your article is about testing an epidermal growth factor receptor (EGFR) antagonist in lung cancer, you should report all associations with entities pursuing diagnostic or therapeutic strategies in cancer in general, not just in the area of EGFR or lung cancer.

Report all sources of revenue paid (or promised to be paid) directly to you or your institution on your behalf over the 36 months prior to submission of the work. This should include all monies from sources with relevance to the submitted work, not just monies from the entity that sponsored the research. Please note that your interactions with the work's sponsor that are outside the submitted work should also be listed here. If there is any question, it is usually better to disclose a relationship than not to do so.

For grants you have received for work outside the submitted work, you should disclose support ONLY from entities that could be perceived to be affected financially by the published work, such as drug companies, or foundations supported by entities that could be perceived to have a financial stake in the outcome. Public funding sources, such as government agencies, charitable foundations or academic institutions, need not be disclosed. For example, if a government agency sponsored a study in which you have been involved and drugs were provided by a pharmaceutical company, you need only list the pharmaceutical company.

#### 4. Intellectual Property.

This section asks about patents and copyrights, whether pending, issued, licensed and/or receiving royalties.

#### 5. Relationships not covered above.

Use this section to report other relationships or activities that readers could perceive to have influenced, or that give the appearance of potentially influencing, what you wrote in the submitted work.

#### Definitions.

**Entity:** government agency, foundation, commercial sponsor, academic institution, etc.

**Grant:** A grant from an entity, generally [but not always] paid to your organization

**Personal Fees:** Monies paid to you for services rendered, generally honoraria, royalties, or fees for consulting, lectures, speakers bureaus, expert testimony, employment, or other affiliations

**Non-Financial Support:** Examples include drugs/equipment supplied by the entity, travel paid by the entity, writing assistance, administrative support, etc.

**Other:** Anything not covered under the previous three boxes

**Pending:** The patent has been filed but not issued

**Issued:** The patent has been issued by the agency

**Licensed:** The patent has been licensed to an entity, whether earning royalties or not

**Royalties:** Funds are coming in to you or your institution due to your patent

## ICMJE Form for Disclosure of Potential Conflicts of Interest

### Section 1. Identifying Information

|                                                                                                                 |                                                                     |                                               |
|-----------------------------------------------------------------------------------------------------------------|---------------------------------------------------------------------|-----------------------------------------------|
| 1. Given Name (First Name)<br>Samuel                                                                            | 2. Surname (Last Name)<br>Merrill                                   | 3. Date<br>31-January-2018                    |
| 4. Are you the corresponding author?                                                                            | <input type="checkbox"/> Yes <input checked="" type="checkbox"/> No | Corresponding Author's Name<br>Robert Brodsky |
| 5. Manuscript Title<br>Germline mutations in the alternative pathway of complement predispose to HELLP syndrome |                                                                     |                                               |
| 6. Manuscript Identifying Number (if you know it)<br>99128-INS-CMED-RV-3                                        |                                                                     |                                               |

### Section 2. The Work Under Consideration for Publication

Did you or your institution **at any time** receive payment or services from a third party (government, commercial, private foundation, etc.) for any aspect of the submitted work (including but not limited to grants, data monitoring board, study design, manuscript preparation, statistical analysis, etc.)?

Are there any relevant conflicts of interest?  Yes  No

### Section 3. Relevant financial activities outside the submitted work.

Place a check in the appropriate boxes in the table to indicate whether you have financial relationships (regardless of amount of compensation) with entities as described in the instructions. Use one line for each entity; add as many lines as you need by clicking the "Add +" box. You should report relationships that were **present during the 36 months prior to publication**.

Are there any relevant conflicts of interest?  Yes  No

### Section 4. Intellectual Property -- Patents & Copyrights

Do you have any patents, whether planned, pending or issued, broadly relevant to the work?  Yes  No

## ICMJE Form for Disclosure of Potential Conflicts of Interest

---

### Section 5. Relationships not covered above

Are there other relationships or activities that readers could perceive to have influenced, or that give the appearance of potentially influencing, what you wrote in the submitted work?

- Yes, the following relationships/conditions/circumstances are present (explain below):
- No other relationships/conditions/circumstances that present a potential conflict of interest

At the time of manuscript acceptance, journals will ask authors to confirm and, if necessary, update their disclosure statements. On occasion, journals may ask authors to disclose further information about reported relationships.

### Section 6. Disclosure Statement

Based on the above disclosures, this form will automatically generate a disclosure statement, which will appear in the box below.

Dr. Merrill has nothing to disclose.

### Evaluation and Feedback

Please visit <http://www.icmje.org/cgi-bin/feedback> to provide feedback on your experience with completing this form.

## ICMJE Form for Disclosure of Potential Conflicts of Interest

### Instructions

The purpose of this form is to provide readers of your manuscript with information about your other interests that could influence how they receive and understand your work. The form is designed to be completed electronically and stored electronically. It contains programming that allows appropriate data display. Each author should submit a separate form and is responsible for the accuracy and completeness of the submitted information. The form is in six parts.

#### 1. Identifying information.

#### 2. The work under consideration for publication.

This section asks for information about the work that you have submitted for publication. The time frame for this reporting is that of the work itself, from the initial conception and planning to the present. The requested information is about resources that you received, either directly or indirectly (via your institution), to enable you to complete the work. Checking "No" means that you did the work without receiving any financial support from any third party -- that is, the work was supported by funds from the same institution that pays your salary and that institution did not receive third-party funds with which to pay you. If you or your institution received funds from a third party to support the work, such as a government granting agency, charitable foundation or commercial sponsor, check "Yes".

#### 3. Relevant financial activities outside the submitted work.

This section asks about your financial relationships with entities in the bio-medical arena that could be perceived to influence, or that give the appearance of potentially influencing, what you wrote in the submitted work. You should disclose interactions with ANY entity that could be considered broadly relevant to the work. For example, if your article is about testing an epidermal growth factor receptor (EGFR) antagonist in lung cancer, you should report all associations with entities pursuing diagnostic or therapeutic strategies in cancer in general, not just in the area of EGFR or lung cancer.

Report all sources of revenue paid (or promised to be paid) directly to you or your institution on your behalf over the 36 months prior to submission of the work. This should include all monies from sources with relevance to the submitted work, not just monies from the entity that sponsored the research. Please note that your interactions with the work's sponsor that are outside the submitted work should also be listed here. If there is any question, it is usually better to disclose a relationship than not to do so.

For grants you have received for work outside the submitted work, you should disclose support ONLY from entities that could be perceived to be affected financially by the published work, such as drug companies, or foundations supported by entities that could be perceived to have a financial stake in the outcome. Public funding sources, such as government agencies, charitable foundations or academic institutions, need not be disclosed. For example, if a government agency sponsored a study in which you have been involved and drugs were provided by a pharmaceutical company, you need only list the pharmaceutical company.

#### 4. Intellectual Property.

This section asks about patents and copyrights, whether pending, issued, licensed and/or receiving royalties.

#### 5. Relationships not covered above.

Use this section to report other relationships or activities that readers could perceive to have influenced, or that give the appearance of potentially influencing, what you wrote in the submitted work.

#### Definitions.

**Entity:** government agency, foundation, commercial sponsor, academic institution, etc.

**Grant:** A grant from an entity, generally [but not always] paid to your organization

**Personal Fees:** Monies paid to you for services rendered, generally honoraria, royalties, or fees for consulting, lectures, speakers bureaus, expert testimony, employment, or other affiliations

**Non-Financial Support:** Examples include drugs/equipment supplied by the entity, travel paid by the entity, writing assistance, administrative support, etc.

**Other:** Anything not covered under the previous three boxes

**Pending:** The patent has been filed but not issued

**Issued:** The patent has been issued by the agency

**Licensed:** The patent has been licensed to an entity, whether earning royalties or not

**Royalties:** Funds are coming in to you or your institution due to your patent

## ICMJE Form for Disclosure of Potential Conflicts of Interest

### Section 1. Identifying Information

|                                                                                                                 |                                                                     |                                               |
|-----------------------------------------------------------------------------------------------------------------|---------------------------------------------------------------------|-----------------------------------------------|
| 1. Given Name (First Name)<br>Jagar                                                                             | 2. Surname (Last Name)<br>Jasem                                     | 3. Date<br>01-February-2018                   |
| 4. Are you the corresponding author?                                                                            | <input type="checkbox"/> Yes <input checked="" type="checkbox"/> No | Corresponding Author's Name<br>Robert Brodsky |
| 5. Manuscript Title<br>Germline mutations in the alternative pathway of complement predispose to HELLP syndrome |                                                                     |                                               |
| 6. Manuscript Identifying Number (if you know it)<br>99128-INS-CMED-RV-3                                        |                                                                     |                                               |

### Section 2. The Work Under Consideration for Publication

Did you or your institution **at any time** receive payment or services from a third party (government, commercial, private foundation, etc.) for any aspect of the submitted work (including but not limited to grants, data monitoring board, study design, manuscript preparation, statistical analysis, etc.)?

Are there any relevant conflicts of interest?  Yes  No

### Section 3. Relevant financial activities outside the submitted work.

Place a check in the appropriate boxes in the table to indicate whether you have financial relationships (regardless of amount of compensation) with entities as described in the instructions. Use one line for each entity; add as many lines as you need by clicking the "Add +" box. You should report relationships that were **present during the 36 months prior to publication**.

Are there any relevant conflicts of interest?  Yes  No

### Section 4. Intellectual Property -- Patents & Copyrights

Do you have any patents, whether planned, pending or issued, broadly relevant to the work?  Yes  No



## ICMJE Form for Disclosure of Potential Conflicts of Interest

---

### Section 5. Relationships not covered above

Are there other relationships or activities that readers could perceive to have influenced, or that give the appearance of potentially influencing, what you wrote in the submitted work?

- Yes, the following relationships/conditions/circumstances are present (explain below):
- No other relationships/conditions/circumstances that present a potential conflict of interest

At the time of manuscript acceptance, journals will ask authors to confirm and, if necessary, update their disclosure statements. On occasion, journals may ask authors to disclose further information about reported relationships.

### Section 6. Disclosure Statement

Based on the above disclosures, this form will automatically generate a disclosure statement, which will appear in the box below.

Dr. Jasem has nothing to disclose.

### Evaluation and Feedback

Please visit <http://www.icmje.org/cgi-bin/feedback> to provide feedback on your experience with completing this form.

## ICMJE Form for Disclosure of Potential Conflicts of Interest

### Instructions

The purpose of this form is to provide readers of your manuscript with information about your other interests that could influence how they receive and understand your work. The form is designed to be completed electronically and stored electronically. It contains programming that allows appropriate data display. Each author should submit a separate form and is responsible for the accuracy and completeness of the submitted information. The form is in six parts.

#### 1. Identifying information.

#### 2. The work under consideration for publication.

This section asks for information about the work that you have submitted for publication. The time frame for this reporting is that of the work itself, from the initial conception and planning to the present. The requested information is about resources that you received, either directly or indirectly (via your institution), to enable you to complete the work. Checking "No" means that you did the work without receiving any financial support from any third party -- that is, the work was supported by funds from the same institution that pays your salary and that institution did not receive third-party funds with which to pay you. If you or your institution received funds from a third party to support the work, such as a government granting agency, charitable foundation or commercial sponsor, check "Yes".

#### 3. Relevant financial activities outside the submitted work.

This section asks about your financial relationships with entities in the bio-medical arena that could be perceived to influence, or that give the appearance of potentially influencing, what you wrote in the submitted work. You should disclose interactions with ANY entity that could be considered broadly relevant to the work. For example, if your article is about testing an epidermal growth factor receptor (EGFR) antagonist in lung cancer, you should report all associations with entities pursuing diagnostic or therapeutic strategies in cancer in general, not just in the area of EGFR or lung cancer.

Report all sources of revenue paid (or promised to be paid) directly to you or your institution on your behalf over the 36 months prior to submission of the work. This should include all monies from sources with relevance to the submitted work, not just monies from the entity that sponsored the research. Please note that your interactions with the work's sponsor that are outside the submitted work should also be listed here. If there is any question, it is usually better to disclose a relationship than not to do so.

For grants you have received for work outside the submitted work, you should disclose support ONLY from entities that could be perceived to be affected financially by the published work, such as drug companies, or foundations supported by entities that could be perceived to have a financial stake in the outcome. Public funding sources, such as government agencies, charitable foundations or academic institutions, need not be disclosed. For example, if a government agency sponsored a study in which you have been involved and drugs were provided by a pharmaceutical company, you need only list the pharmaceutical company.

#### 4. Intellectual Property.

This section asks about patents and copyrights, whether pending, issued, licensed and/or receiving royalties.

#### 5. Relationships not covered above.

Use this section to report other relationships or activities that readers could perceive to have influenced, or that give the appearance of potentially influencing, what you wrote in the submitted work.

#### Definitions.

**Entity:** government agency, foundation, commercial sponsor, academic institution, etc.

**Grant:** A grant from an entity, generally [but not always] paid to your organization

**Personal Fees:** Monies paid to you for services rendered, generally honoraria, royalties, or fees for consulting, lectures, speakers bureaus, expert testimony, employment, or other affiliations

**Non-Financial Support:** Examples include drugs/equipment supplied by the entity, travel paid by the entity, writing assistance, administrative support, etc.

**Other:** Anything not covered under the previous three boxes

**Pending:** The patent has been filed but not issued

**Issued:** The patent has been issued by the agency

**Licensed:** The patent has been licensed to an entity, whether earning royalties or not

**Royalties:** Funds are coming in to you or your institution due to your patent

## ICMJE Form for Disclosure of Potential Conflicts of Interest

### Section 1. Identifying Information

|                                                                                                                 |                                                                     |                                               |
|-----------------------------------------------------------------------------------------------------------------|---------------------------------------------------------------------|-----------------------------------------------|
| 1. Given Name (First Name)<br>Igor                                                                              | 2. Surname (Last Name)<br>Makhlin                                   | 3. Date<br>31-January-2018                    |
| 4. Are you the corresponding author?                                                                            | <input type="checkbox"/> Yes <input checked="" type="checkbox"/> No | Corresponding Author's Name<br>Robert Brodsky |
| 5. Manuscript Title<br>Germline mutations in the alternative pathway of complement predispose to HELLP syndrome |                                                                     |                                               |
| 6. Manuscript Identifying Number (if you know it)<br>99128-INS-CMED-RV-3                                        |                                                                     |                                               |

### Section 2. The Work Under Consideration for Publication

Did you or your institution **at any time** receive payment or services from a third party (government, commercial, private foundation, etc.) for any aspect of the submitted work (including but not limited to grants, data monitoring board, study design, manuscript preparation, statistical analysis, etc.)?

Are there any relevant conflicts of interest?  Yes  No

### Section 3. Relevant financial activities outside the submitted work.

Place a check in the appropriate boxes in the table to indicate whether you have financial relationships (regardless of amount of compensation) with entities as described in the instructions. Use one line for each entity; add as many lines as you need by clicking the "Add +" box. You should report relationships that were **present during the 36 months prior to publication**.

Are there any relevant conflicts of interest?  Yes  No

### Section 4. Intellectual Property -- Patents & Copyrights

Do you have any patents, whether planned, pending or issued, broadly relevant to the work?  Yes  No

## ICMJE Form for Disclosure of Potential Conflicts of Interest

---

### Section 5. Relationships not covered above

Are there other relationships or activities that readers could perceive to have influenced, or that give the appearance of potentially influencing, what you wrote in the submitted work?

- Yes, the following relationships/conditions/circumstances are present (explain below):
- No other relationships/conditions/circumstances that present a potential conflict of interest

At the time of manuscript acceptance, journals will ask authors to confirm and, if necessary, update their disclosure statements. On occasion, journals may ask authors to disclose further information about reported relationships.

### Section 6. Disclosure Statement

Based on the above disclosures, this form will automatically generate a disclosure statement, which will appear in the box below.

### Evaluation and Feedback

Please visit <http://www.icmje.org/cgi-bin/feedback> to provide feedback on your experience with completing this form.

## ICMJJE Form for Disclosure of Potential Conflicts of Interest

### Instructions

The purpose of this form is to provide readers of your manuscript with information about your other interests that could influence how they receive and understand your work. The form is designed to be completed electronically and stored electronically. It contains programming that allows appropriate data display. Each author should submit a separate form and is responsible for the accuracy and completeness of the submitted information. The form is in six parts.

#### 1. Identifying information.

#### 2. The work under consideration for publication.

This section asks for information about the work that you have submitted for publication. The time frame for this reporting is that of the work itself, from the initial conception and planning to the present. The requested information is about resources that you received, either directly or indirectly (via your institution), to enable you to complete the work. Checking "No" means that you did the work without receiving any financial support from any third party -- that is, the work was supported by funds from the same institution that pays your salary and that institution did not receive third-party funds with which to pay you. If you or your institution received funds from a third party to support the work, such as a government granting agency, charitable foundation or commercial sponsor, check "Yes".

#### 3. Relevant financial activities outside the submitted work.

This section asks about your financial relationships with entities in the bio-medical arena that could be perceived to influence, or that give the appearance of potentially influencing, what you wrote in the submitted work. You should disclose interactions with ANY entity that could be considered broadly relevant to the work. For example, if your article is about testing an epidermal growth factor receptor (EGFR) antagonist in lung cancer, you should report all associations with entities pursuing diagnostic or therapeutic strategies in cancer in general, not just in the area of EGFR or lung cancer.

Report all sources of revenue paid (or promised to be paid) directly to you or your institution on your behalf over the 36 months prior to submission of the work. This should include all monies from sources with relevance to the submitted work, not just monies from the entity that sponsored the research. Please note that your interactions with the work's sponsor that are outside the submitted work should also be listed here. If there is any question, it is usually better to disclose a relationship than not to do so.

For grants you have received for work outside the submitted work, you should disclose support ONLY from entities that could be perceived to be affected financially by the published work, such as drug companies, or foundations supported by entities that could be perceived to have a financial stake in the outcome. Public funding sources, such as government agencies, charitable foundations or academic institutions, need not be disclosed. For example, if a government agency sponsored a study in which you have been involved and drugs were provided by a pharmaceutical company, you need only list the pharmaceutical company.

#### 4. Intellectual Property.

This section asks about patents and copyrights, whether pending, issued, licensed and/or receiving royalties.

#### 5. Relationships not covered above.

Use this section to report other relationships or activities that readers could perceive to have influenced, or that give the appearance of potentially influencing, what you wrote in the submitted work.

#### Definitions.

**Entity:** government agency, foundation, commercial sponsor, academic institution, etc.

**Grant:** A grant from an entity, generally [but not always] paid to your organization

**Personal Fees:** Monies paid to you for services rendered, generally honoraria, royalties, or fees for consulting, lectures, speakers bureaus, expert testimony, employment, or other affiliations

**Non-Financial Support:** Examples include drugs/equipment supplied by the entity, travel paid by the entity, writing assistance, administrative support, etc.

**Other:** Anything not covered under the previous three boxes

**Pending:** The patent has been filed but not issued

**Issued:** The patent has been issued by the agency

**Licensed:** The patent has been licensed to an entity, whether earning royalties or not

**Royalties:** Funds are coming in to you or your institution due to your patent

## ICMJE Form for Disclosure of Potential Conflicts of Interest

### Section 1. Identifying Information

1. Given Name (First Name)  
John

2. Surname (Last Name)  
Sperati

3. Date  
01-February-2018

4. Are you the corresponding author?  Yes  No  
Corresponding Author's Name  
Robert Brodsky

5. Manuscript Title  
Germline mutations in the alternative pathway of complement predispose to HELLP syndrome

6. Manuscript Identifying Number (if you know it)  
99128-INS-CMED-RV-3

### Section 2. The Work Under Consideration for Publication

Did you or your institution **at any time** receive payment or services from a third party (government, commercial, private foundation, etc.) for any aspect of the submitted work (including but not limited to grants, data monitoring board, study design, manuscript preparation, statistical analysis, etc.)?

Are there any relevant conflicts of interest?  Yes  No

### Section 3. Relevant financial activities outside the submitted work.

Place a check in the appropriate boxes in the table to indicate whether you have financial relationships (regardless of amount of compensation) with entities as described in the instructions. Use one line for each entity; add as many lines as you need by clicking the "Add +" box. You should report relationships that were **present during the 36 months prior to publication**.

Are there any relevant conflicts of interest?  Yes  No

If yes, please fill out the appropriate information below.

| Name of Entity               | Grant?                              | Personal Fees?                      | Non-Financial Support?   | Other?                   | Comments                                                     |
|------------------------------|-------------------------------------|-------------------------------------|--------------------------|--------------------------|--------------------------------------------------------------|
| Alexion Pharmaceuticals, Inc | <input type="checkbox"/>            | <input checked="" type="checkbox"/> | <input type="checkbox"/> | <input type="checkbox"/> | Chair of Data Safety and Monitoring Board for clinical trial |
| Alexion Pharmaceuticals, Inc | <input checked="" type="checkbox"/> | <input type="checkbox"/>            | <input type="checkbox"/> | <input type="checkbox"/> | Site Principal Investigator, Global aHUS Registry            |

### Section 4. Intellectual Property -- Patents & Copyrights

Do you have any patents, whether planned, pending or issued, broadly relevant to the work?  Yes  No

## ICMJE Form for Disclosure of Potential Conflicts of Interest

---

### Section 5. Relationships not covered above

Are there other relationships or activities that readers could perceive to have influenced, or that give the appearance of potentially influencing, what you wrote in the submitted work?

- Yes, the following relationships/conditions/circumstances are present (explain below):
- No other relationships/conditions/circumstances that present a potential conflict of interest

At the time of manuscript acceptance, journals will ask authors to confirm and, if necessary, update their disclosure statements. On occasion, journals may ask authors to disclose further information about reported relationships.

### Section 6. Disclosure Statement

Based on the above disclosures, this form will automatically generate a disclosure statement, which will appear in the box below.

Dr. Sperati reports personal fees from Alexion Pharmaceuticals, Inc, grants from Alexion Pharmaceuticals, Inc, outside the submitted work; .

### Evaluation and Feedback

Please visit <http://www.icmje.org/cgi-bin/feedback> to provide feedback on your experience with completing this form.

## ICMJE Form for Disclosure of Potential Conflicts of Interest

### Instructions

The purpose of this form is to provide readers of your manuscript with information about your other interests that could influence how they receive and understand your work. The form is designed to be completed electronically and stored electronically. It contains programming that allows appropriate data display. Each author should submit a separate form and is responsible for the accuracy and completeness of the submitted information. The form is in six parts.

#### 1. Identifying information.

#### 2. The work under consideration for publication.

This section asks for information about the work that you have submitted for publication. The time frame for this reporting is that of the work itself, from the initial conception and planning to the present. The requested information is about resources that you received, either directly or indirectly (via your institution), to enable you to complete the work. Checking "No" means that you did the work without receiving any financial support from any third party -- that is, the work was supported by funds from the same institution that pays your salary and that institution did not receive third-party funds with which to pay you. If you or your institution received funds from a third party to support the work, such as a government granting agency, charitable foundation or commercial sponsor, check "Yes".

#### 3. Relevant financial activities outside the submitted work.

This section asks about your financial relationships with entities in the bio-medical arena that could be perceived to influence, or that give the appearance of potentially influencing, what you wrote in the submitted work. You should disclose interactions with ANY entity that could be considered broadly relevant to the work. For example, if your article is about testing an epidermal growth factor receptor (EGFR) antagonist in lung cancer, you should report all associations with entities pursuing diagnostic or therapeutic strategies in cancer in general, not just in the area of EGFR or lung cancer.

Report all sources of revenue paid (or promised to be paid) directly to you or your institution on your behalf over the 36 months prior to submission of the work. This should include all monies from sources with relevance to the submitted work, not just monies from the entity that sponsored the research. Please note that your interactions with the work's sponsor that are outside the submitted work should also be listed here. If there is any question, it is usually better to disclose a relationship than not to do so.

For grants you have received for work outside the submitted work, you should disclose support ONLY from entities that could be perceived to be affected financially by the published work, such as drug companies, or foundations supported by entities that could be perceived to have a financial stake in the outcome. Public funding sources, such as government agencies, charitable foundations or academic institutions, need not be disclosed. For example, if a government agency sponsored a study in which you have been involved and drugs were provided by a pharmaceutical company, you need only list the pharmaceutical company.

#### 4. Intellectual Property.

This section asks about patents and copyrights, whether pending, issued, licensed and/or receiving royalties.

#### 5. Relationships not covered above.

Use this section to report other relationships or activities that readers could perceive to have influenced, or that give the appearance of potentially influencing, what you wrote in the submitted work.

#### Definitions.

**Entity:** government agency, foundation, commercial sponsor, academic institution, etc.

**Grant:** A grant from an entity, generally [but not always] paid to your organization

**Personal Fees:** Monies paid to you for services rendered, generally honoraria, royalties, or fees for consulting, lectures, speakers bureaus, expert testimony, employment, or other affiliations

**Non-Financial Support:** Examples include drugs/equipment supplied by the entity, travel paid by the entity, writing assistance, administrative support, etc.

**Other:** Anything not covered under the previous three boxes

**Pending:** The patent has been filed but not issued

**Issued:** The patent has been issued by the agency

**Licensed:** The patent has been licensed to an entity, whether earning royalties or not

**Royalties:** Funds are coming in to you or your institution due to your patent



## ICMJE Form for Disclosure of Potential Conflicts of Interest

### Section 1. Identifying Information

1. Given Name (First Name)

Andrea

2. Surname (Last Name)

Baines

3. Date

01-February-2018

4. Are you the corresponding author?

 Yes No

Corresponding Author's Name

Robert Brodsky

5. Manuscript Title

Germline mutations in the alternative pathway of complement predispose to HELLP syndrome

6. Manuscript Identifying Number (if you know it)

99128-INS-CMED-RV-3

### Section 2. The Work Under Consideration for Publication

Did you or your institution **at any time** receive payment or services from a third party (government, commercial, private foundation, etc.) for any aspect of the submitted work (including but not limited to grants, data monitoring board, study design, manuscript preparation, statistical analysis, etc.)?

Are there any relevant conflicts of interest?  Yes  No

### Section 3. Relevant financial activities outside the submitted work.

Place a check in the appropriate boxes in the table to indicate whether you have financial relationships (regardless of amount of compensation) with entities as described in the instructions. Use one line for each entity; add as many lines as you need by clicking the "Add +" box. You should report relationships that were **present during the 36 months prior to publication**.

Are there any relevant conflicts of interest?  Yes  No

### Section 4. Intellectual Property -- Patents & Copyrights

Do you have any patents, whether planned, pending or issued, broadly relevant to the work?  Yes  No

## ICMJE Form for Disclosure of Potential Conflicts of Interest

---

### Section 5. Relationships not covered above

Are there other relationships or activities that readers could perceive to have influenced, or that give the appearance of potentially influencing, what you wrote in the submitted work?

- Yes, the following relationships/conditions/circumstances are present (explain below):
- No other relationships/conditions/circumstances that present a potential conflict of interest

At the time of manuscript acceptance, journals will ask authors to confirm and, if necessary, update their disclosure statements. On occasion, journals may ask authors to disclose further information about reported relationships.

### Section 6. Disclosure Statement

Based on the above disclosures, this form will automatically generate a disclosure statement, which will appear in the box below.

Dr. Baines has nothing to disclose.

### Evaluation and Feedback

Please visit <http://www.icmje.org/cgi-bin/feedback> to provide feedback on your experience with completing this form.

## ICMJE Form for Disclosure of Potential Conflicts of Interest

### Instructions

The purpose of this form is to provide readers of your manuscript with information about your other interests that could influence how they receive and understand your work. The form is designed to be completed electronically and stored electronically. It contains programming that allows appropriate data display. Each author should submit a separate form and is responsible for the accuracy and completeness of the submitted information. The form is in six parts.

#### 1. Identifying information.

#### 2. The work under consideration for publication.

This section asks for information about the work that you have submitted for publication. The time frame for this reporting is that of the work itself, from the initial conception and planning to the present. The requested information is about resources that you received, either directly or indirectly (via your institution), to enable you to complete the work. Checking "No" means that you did the work without receiving any financial support from any third party -- that is, the work was supported by funds from the same institution that pays your salary and that institution did not receive third-party funds with which to pay you. If you or your institution received funds from a third party to support the work, such as a government granting agency, charitable foundation or commercial sponsor, check "Yes".

#### 3. Relevant financial activities outside the submitted work.

This section asks about your financial relationships with entities in the bio-medical arena that could be perceived to influence, or that give the appearance of potentially influencing, what you wrote in the submitted work. You should disclose interactions with ANY entity that could be considered broadly relevant to the work. For example, if your article is about testing an epidermal growth factor receptor (EGFR) antagonist in lung cancer, you should report all associations with entities pursuing diagnostic or therapeutic strategies in cancer in general, not just in the area of EGFR or lung cancer.

Report all sources of revenue paid (or promised to be paid) directly to you or your institution on your behalf over the 36 months prior to submission of the work. This should include all monies from sources with relevance to the submitted work, not just monies from the entity that sponsored the research. Please note that your interactions with the work's sponsor that are outside the submitted work should also be listed here. If there is any question, it is usually better to disclose a relationship than not to do so.

For grants you have received for work outside the submitted work, you should disclose support ONLY from entities that could be perceived to be affected financially by the published work, such as drug companies, or foundations supported by entities that could be perceived to have a financial stake in the outcome. Public funding sources, such as government agencies, charitable foundations or academic institutions, need not be disclosed. For example, if a government agency sponsored a study in which you have been involved and drugs were provided by a pharmaceutical company, you need only list the pharmaceutical company.

#### 4. Intellectual Property.

This section asks about patents and copyrights, whether pending, issued, licensed and/or receiving royalties.

#### 5. Relationships not covered above.

Use this section to report other relationships or activities that readers could perceive to have influenced, or that give the appearance of potentially influencing, what you wrote in the submitted work.

#### Definitions.

**Entity:** government agency, foundation, commercial sponsor, academic institution, etc.

**Grant:** A grant from an entity, generally [but not always] paid to your organization

**Personal Fees:** Monies paid to you for services rendered, generally honoraria, royalties, or fees for consulting, lectures, speakers bureaus, expert testimony, employment, or other affiliations

**Non-Financial Support:** Examples include drugs/equipment supplied by the entity, travel paid by the entity, writing assistance, administrative support, etc.

**Other:** Anything not covered under the previous three boxes

**Pending:** The patent has been filed but not issued

**Issued:** The patent has been issued by the agency

**Licensed:** The patent has been licensed to an entity, whether earning royalties or not

**Royalties:** Funds are coming in to you or your institution due to your patent

## ICMJE Form for Disclosure of Potential Conflicts of Interest

### Section 1. Identifying Information

|                                                                                                                 |                                                                     |                                               |
|-----------------------------------------------------------------------------------------------------------------|---------------------------------------------------------------------|-----------------------------------------------|
| 1. Given Name (First Name)<br>Arthur                                                                            | 2. Surname (Last Name)<br>Vaught                                    | 3. Date<br>01-February-2018                   |
| 4. Are you the corresponding author?                                                                            | <input type="checkbox"/> Yes <input checked="" type="checkbox"/> No | Corresponding Author's Name<br>Robert Brodsky |
| 5. Manuscript Title<br>Germline mutations in the alternative pathway of complement predispose to HELLP syndrome |                                                                     |                                               |
| 6. Manuscript Identifying Number (if you know it)<br>99128-INS-CMED-RV-3                                        |                                                                     |                                               |

### Section 2. The Work Under Consideration for Publication

Did you or your institution **at any time** receive payment or services from a third party (government, commercial, private foundation, etc.) for any aspect of the submitted work (including but not limited to grants, data monitoring board, study design, manuscript preparation, statistical analysis, etc.)?

Are there any relevant conflicts of interest?  Yes  No

### Section 3. Relevant financial activities outside the submitted work.

Place a check in the appropriate boxes in the table to indicate whether you have financial relationships (regardless of amount of compensation) with entities as described in the instructions. Use one line for each entity; add as many lines as you need by clicking the "Add +" box. You should report relationships that were **present during the 36 months prior to publication**.

Are there any relevant conflicts of interest?  Yes  No

### Section 4. Intellectual Property -- Patents & Copyrights

Do you have any patents, whether planned, pending or issued, broadly relevant to the work?  Yes  No

## ICMJE Form for Disclosure of Potential Conflicts of Interest

---

### Section 5. Relationships not covered above

Are there other relationships or activities that readers could perceive to have influenced, or that give the appearance of potentially influencing, what you wrote in the submitted work?

- Yes, the following relationships/conditions/circumstances are present (explain below):
- No other relationships/conditions/circumstances that present a potential conflict of interest

At the time of manuscript acceptance, journals will ask authors to confirm and, if necessary, update their disclosure statements. On occasion, journals may ask authors to disclose further information about reported relationships.

### Section 6. Disclosure Statement

Based on the above disclosures, this form will automatically generate a disclosure statement, which will appear in the box below.

Dr. Vaught has nothing to disclose.

### Evaluation and Feedback

Please visit <http://www.icmje.org/cgi-bin/feedback> to provide feedback on your experience with completing this form.

## ICMJE Form for Disclosure of Potential Conflicts of Interest

### Instructions

The purpose of this form is to provide readers of your manuscript with information about your other interests that could influence how they receive and understand your work. The form is designed to be completed electronically and stored electronically. It contains programming that allows appropriate data display. Each author should submit a separate form and is responsible for the accuracy and completeness of the submitted information. The form is in six parts.

#### 1. Identifying information.

#### 2. The work under consideration for publication.

This section asks for information about the work that you have submitted for publication. The time frame for this reporting is that of the work itself, from the initial conception and planning to the present. The requested information is about resources that you received, either directly or indirectly (via your institution), to enable you to complete the work. Checking "No" means that you did the work without receiving any financial support from any third party -- that is, the work was supported by funds from the same institution that pays your salary and that institution did not receive third-party funds with which to pay you. If you or your institution received funds from a third party to support the work, such as a government granting agency, charitable foundation or commercial sponsor, check "Yes".

#### 3. Relevant financial activities outside the submitted work.

This section asks about your financial relationships with entities in the bio-medical arena that could be perceived to influence, or that give the appearance of potentially influencing, what you wrote in the submitted work. You should disclose interactions with ANY entity that could be considered broadly relevant to the work. For example, if your article is about testing an epidermal growth factor receptor (EGFR) antagonist in lung cancer, you should report all associations with entities pursuing diagnostic or therapeutic strategies in cancer in general, not just in the area of EGFR or lung cancer.

Report all sources of revenue paid (or promised to be paid) directly to you or your institution on your behalf over the 36 months prior to submission of the work. This should include all monies from sources with relevance to the submitted work, not just monies from the entity that sponsored the research. Please note that your interactions with the work's sponsor that are outside the submitted work should also be listed here. If there is any question, it is usually better to disclose a relationship than not to do so.

For grants you have received for work outside the submitted work, you should disclose support ONLY from entities that could be perceived to be affected financially by the published work, such as drug companies, or foundations supported by entities that could be perceived to have a financial stake in the outcome. Public funding sources, such as government agencies, charitable foundations or academic institutions, need not be disclosed. For example, if a government agency sponsored a study in which you have been involved and drugs were provided by a pharmaceutical company, you need only list the pharmaceutical company.

#### 4. Intellectual Property.

This section asks about patents and copyrights, whether pending, issued, licensed and/or receiving royalties.

#### 5. Relationships not covered above.

Use this section to report other relationships or activities that readers could perceive to have influenced, or that give the appearance of potentially influencing, what you wrote in the submitted work.

#### Definitions.

**Entity:** government agency, foundation, commercial sponsor, academic institution, etc.

**Grant:** A grant from an entity, generally [but not always] paid to your organization

**Personal Fees:** Monies paid to you for services rendered, generally honoraria, royalties, or fees for consulting, lectures, speakers bureaus, expert testimony, employment, or other affiliations

**Non-Financial Support:** Examples include drugs/equipment supplied by the entity, travel paid by the entity, writing assistance, administrative support, etc.

**Other:** Anything not covered under the previous three boxes

**Pending:** The patent has been filed but not issued

**Issued:** The patent has been issued by the agency

**Licensed:** The patent has been licensed to an entity, whether earning royalties or not

**Royalties:** Funds are coming in to you or your institution due to your patent

## ICMJE Form for Disclosure of Potential Conflicts of Interest

### Section 1. Identifying Information

|                                                                                                                 |                                                                     |                                               |
|-----------------------------------------------------------------------------------------------------------------|---------------------------------------------------------------------|-----------------------------------------------|
| 1. Given Name (First Name)<br>Evan                                                                              | 2. Surname (Last Name)<br>Braunstein                                | 3. Date<br>31-January-2018                    |
| 4. Are you the corresponding author?                                                                            | <input type="checkbox"/> Yes <input checked="" type="checkbox"/> No | Corresponding Author's Name<br>Robert Brodsky |
| 5. Manuscript Title<br>Germline mutations in the alternative pathway of complement predispose to HELLP syndrome |                                                                     |                                               |
| 6. Manuscript Identifying Number (if you know it)<br>99128-INS-CMED-RV-3                                        |                                                                     |                                               |

### Section 2. The Work Under Consideration for Publication

Did you or your institution **at any time** receive payment or services from a third party (government, commercial, private foundation, etc.) for any aspect of the submitted work (including but not limited to grants, data monitoring board, study design, manuscript preparation, statistical analysis, etc.)?

Are there any relevant conflicts of interest?  Yes  No

### Section 3. Relevant financial activities outside the submitted work.

Place a check in the appropriate boxes in the table to indicate whether you have financial relationships (regardless of amount of compensation) with entities as described in the instructions. Use one line for each entity; add as many lines as you need by clicking the "Add +" box. You should report relationships that were **present during the 36 months prior to publication**.

Are there any relevant conflicts of interest?  Yes  No

### Section 4. Intellectual Property -- Patents & Copyrights

Do you have any patents, whether planned, pending or issued, broadly relevant to the work?  Yes  No

## ICMJE Form for Disclosure of Potential Conflicts of Interest

---

### Section 5. Relationships not covered above

Are there other relationships or activities that readers could perceive to have influenced, or that give the appearance of potentially influencing, what you wrote in the submitted work?

- Yes, the following relationships/conditions/circumstances are present (explain below):
- No other relationships/conditions/circumstances that present a potential conflict of interest

At the time of manuscript acceptance, journals will ask authors to confirm and, if necessary, update their disclosure statements. On occasion, journals may ask authors to disclose further information about reported relationships.

### Section 6. Disclosure Statement

Based on the above disclosures, this form will automatically generate a disclosure statement, which will appear in the box below.

Dr. Braunstein has nothing to disclose.

### Evaluation and Feedback

Please visit <http://www.icmje.org/cgi-bin/feedback> to provide feedback on your experience with completing this form.



## ICMJE Form for Disclosure of Potential Conflicts of Interest

### Instructions

The purpose of this form is to provide readers of your manuscript with information about your other interests that could influence how they receive and understand your work. The form is designed to be completed electronically and stored electronically. It contains programming that allows appropriate data display. Each author should submit a separate form and is responsible for the accuracy and completeness of the submitted information. The form is in six parts.

#### 1. Identifying information.

#### 2. The work under consideration for publication.

This section asks for information about the work that you have submitted for publication. The time frame for this reporting is that of the work itself, from the initial conception and planning to the present. The requested information is about resources that you received, either directly or indirectly (via your institution), to enable you to complete the work. Checking "No" means that you did the work without receiving any financial support from any third party -- that is, the work was supported by funds from the same institution that pays your salary and that institution did not receive third-party funds with which to pay you. If you or your institution received funds from a third party to support the work, such as a government granting agency, charitable foundation or commercial sponsor, check "Yes".

#### 3. Relevant financial activities outside the submitted work.

This section asks about your financial relationships with entities in the bio-medical arena that could be perceived to influence, or that give the appearance of potentially influencing, what you wrote in the submitted work. You should disclose interactions with ANY entity that could be considered broadly relevant to the work. For example, if your article is about testing an epidermal growth factor receptor (EGFR) antagonist in lung cancer, you should report all associations with entities pursuing diagnostic or therapeutic strategies in cancer in general, not just in the area of EGFR or lung cancer.

Report all sources of revenue paid (or promised to be paid) directly to you or your institution on your behalf over the 36 months prior to submission of the work. This should include all monies from sources with relevance to the submitted work, not just monies from the entity that sponsored the research. Please note that your interactions with the work's sponsor that are outside the submitted work should also be listed here. If there is any question, it is usually better to disclose a relationship than not to do so.

For grants you have received for work outside the submitted work, you should disclose support ONLY from entities that could be perceived to be affected financially by the published work, such as drug companies, or foundations supported by entities that could be perceived to have a financial stake in the outcome. Public funding sources, such as government agencies, charitable foundations or academic institutions, need not be disclosed. For example, if a government agency sponsored a study in which you have been involved and drugs were provided by a pharmaceutical company, you need only list the pharmaceutical company.

#### 4. Intellectual Property.

This section asks about patents and copyrights, whether pending, issued, licensed and/or receiving royalties.

#### 5. Relationships not covered above.

Use this section to report other relationships or activities that readers could perceive to have influenced, or that give the appearance of potentially influencing, what you wrote in the submitted work.

#### Definitions.

**Entity:** government agency, foundation, commercial sponsor, academic institution, etc.

**Grant:** A grant from an entity, generally [but not always] paid to your organization

**Personal Fees:** Monies paid to you for services rendered, generally honoraria, royalties, or fees for consulting, lectures, speakers bureaus, expert testimony, employment, or other affiliations

**Non-Financial Support:** Examples include drugs/equipment supplied by the entity, travel paid by the entity, writing assistance, administrative support, etc.

**Other:** Anything not covered under the previous three boxes

**Pending:** The patent has been filed but not issued

**Issued:** The patent has been issued by the agency

**Licensed:** The patent has been licensed to an entity, whether earning royalties or not

**Royalties:** Funds are coming in to you or your institution due to your patent

## ICMJE Form for Disclosure of Potential Conflicts of Interest

### Section 1. Identifying Information

|                                                                                                                 |                                                                     |                                               |
|-----------------------------------------------------------------------------------------------------------------|---------------------------------------------------------------------|-----------------------------------------------|
| 1. Given Name (First Name)<br>Karin                                                                             | 2. Surname (Last Name)<br>Blakemore                                 | 3. Date<br>01-February-2018                   |
| 4. Are you the corresponding author?                                                                            | <input type="checkbox"/> Yes <input checked="" type="checkbox"/> No | Corresponding Author's Name<br>Robert Brodsky |
| 5. Manuscript Title<br>Germline mutations in the alternative pathway of complement predispose to HELLP syndrome |                                                                     |                                               |
| 6. Manuscript Identifying Number (if you know it)<br>99128-INS-CMED-RV-3                                        |                                                                     |                                               |

### Section 2. The Work Under Consideration for Publication

Did you or your institution **at any time** receive payment or services from a third party (government, commercial, private foundation, etc.) for any aspect of the submitted work (including but not limited to grants, data monitoring board, study design, manuscript preparation, statistical analysis, etc.)?

Are there any relevant conflicts of interest?  Yes  No

### Section 3. Relevant financial activities outside the submitted work.

Place a check in the appropriate boxes in the table to indicate whether you have financial relationships (regardless of amount of compensation) with entities as described in the instructions. Use one line for each entity; add as many lines as you need by clicking the "Add +" box. You should report relationships that were **present during the 36 months prior to publication**.

Are there any relevant conflicts of interest?  Yes  No

### Section 4. Intellectual Property -- Patents & Copyrights

Do you have any patents, whether planned, pending or issued, broadly relevant to the work?  Yes  No

## ICMJE Form for Disclosure of Potential Conflicts of Interest

---

### Section 5. Relationships not covered above

Are there other relationships or activities that readers could perceive to have influenced, or that give the appearance of potentially influencing, what you wrote in the submitted work?

- Yes, the following relationships/conditions/circumstances are present (explain below):
- No other relationships/conditions/circumstances that present a potential conflict of interest

At the time of manuscript acceptance, journals will ask authors to confirm and, if necessary, update their disclosure statements. On occasion, journals may ask authors to disclose further information about reported relationships.

### Section 6. Disclosure Statement

Based on the above disclosures, this form will automatically generate a disclosure statement, which will appear in the box below.

Dr. Blakemore has nothing to disclose.

### Evaluation and Feedback

Please visit <http://www.icmje.org/cgi-bin/feedback> to provide feedback on your experience with completing this form.

## ICMJE Form for Disclosure of Potential Conflicts of Interest

### Instructions

The purpose of this form is to provide readers of your manuscript with information about your other interests that could influence how they receive and understand your work. The form is designed to be completed electronically and stored electronically. It contains programming that allows appropriate data display. Each author should submit a separate form and is responsible for the accuracy and completeness of the submitted information. The form is in six parts.

#### 1. Identifying information.

#### 2. The work under consideration for publication.

This section asks for information about the work that you have submitted for publication. The time frame for this reporting is that of the work itself, from the initial conception and planning to the present. The requested information is about resources that you received, either directly or indirectly (via your institution), to enable you to complete the work. Checking "No" means that you did the work without receiving any financial support from any third party -- that is, the work was supported by funds from the same institution that pays your salary and that institution did not receive third-party funds with which to pay you. If you or your institution received funds from a third party to support the work, such as a government granting agency, charitable foundation or commercial sponsor, check "Yes".

#### 3. Relevant financial activities outside the submitted work.

This section asks about your financial relationships with entities in the bio-medical arena that could be perceived to influence, or that give the appearance of potentially influencing, what you wrote in the submitted work. You should disclose interactions with ANY entity that could be considered broadly relevant to the work. For example, if your article is about testing an epidermal growth factor receptor (EGFR) antagonist in lung cancer, you should report all associations with entities pursuing diagnostic or therapeutic strategies in cancer in general, not just in the area of EGFR or lung cancer.

Report all sources of revenue paid (or promised to be paid) directly to you or your institution on your behalf over the 36 months prior to submission of the work. This should include all monies from sources with relevance to the submitted work, not just monies from the entity that sponsored the research. Please note that your interactions with the work's sponsor that are outside the submitted work should also be listed here. If there is any question, it is usually better to disclose a relationship than not to do so.

For grants you have received for work outside the submitted work, you should disclose support ONLY from entities that could be perceived to be affected financially by the published work, such as drug companies, or foundations supported by entities that could be perceived to have a financial stake in the outcome. Public funding sources, such as government agencies, charitable foundations or academic institutions, need not be disclosed. For example, if a government agency sponsored a study in which you have been involved and drugs were provided by a pharmaceutical company, you need only list the pharmaceutical company.

#### 4. Intellectual Property.

This section asks about patents and copyrights, whether pending, issued, licensed and/or receiving royalties.

#### 5. Relationships not covered above.

Use this section to report other relationships or activities that readers could perceive to have influenced, or that give the appearance of potentially influencing, what you wrote in the submitted work.

#### Definitions.

**Entity:** government agency, foundation, commercial sponsor, academic institution, etc.

**Grant:** A grant from an entity, generally [but not always] paid to your organization

**Personal Fees:** Monies paid to you for services rendered, generally honoraria, royalties, or fees for consulting, lectures, speakers bureaus, expert testimony, employment, or other affiliations

**Non-Financial Support:** Examples include drugs/equipment supplied by the entity, travel paid by the entity, writing assistance, administrative support, etc.

**Other:** Anything not covered under the previous three boxes

**Pending:** The patent has been filed but not issued

**Issued:** The patent has been issued by the agency

**Licensed:** The patent has been licensed to an entity, whether earning royalties or not

**Royalties:** Funds are coming in to you or your institution due to your patent

## ICMJE Form for Disclosure of Potential Conflicts of Interest

### Section 1. Identifying Information

1. Given Name (First Name) Robert

2. Surname (Last Name) Brodsky

3. Date 30-January-2018

4. Are you the corresponding author?  Yes  No

5. Manuscript Title  
Germline mutations in the alternative pathway of complement predispose to HELLP syndrome

6. Manuscript Identifying Number (if you know it)  
99128-INS-CMED-RV-3

### Section 2. The Work Under Consideration for Publication

Did you or your institution **at any time** receive payment or services from a third party (government, commercial, private foundation, etc.) for any aspect of the submitted work (including but not limited to grants, data monitoring board, study design, manuscript preparation, statistical analysis, etc.)?

Are there any relevant conflicts of interest?  Yes  No

If yes, please fill out the appropriate information below. If you have more than one entity press the "ADD" button to add a row. Excess rows can be removed by pressing the "X" button.

| Name of Institution/Company | Grant?                              | Personal Fees?           | Non-Financial Support?   | Other?                   | Comments |
|-----------------------------|-------------------------------------|--------------------------|--------------------------|--------------------------|----------|
| NHLBI                       | <input checked="" type="checkbox"/> | <input type="checkbox"/> | <input type="checkbox"/> | <input type="checkbox"/> |          |

### Section 3. Relevant financial activities outside the submitted work.

Place a check in the appropriate boxes in the table to indicate whether you have financial relationships (regardless of amount of compensation) with entities as described in the instructions. Use one line for each entity; add as many lines as you need by clicking the "Add +" box. You should report relationships that were **present during the 36 months prior to publication**.

Are there any relevant conflicts of interest?  Yes  No

If yes, please fill out the appropriate information below.

| Name of Entity            | Grant?                              | Personal Fees?           | Non-Financial Support?   | Other?                              | Comments       |
|---------------------------|-------------------------------------|--------------------------|--------------------------|-------------------------------------|----------------|
| Alexion Pharmaceuticals   | <input checked="" type="checkbox"/> | <input type="checkbox"/> | <input type="checkbox"/> | <input checked="" type="checkbox"/> | Advisory Board |
| Achillion Pharmaceuticals | <input type="checkbox"/>            | <input type="checkbox"/> | <input type="checkbox"/> | <input checked="" type="checkbox"/> | Advisory Board |
| Apellis Pharmaceuticals   | <input type="checkbox"/>            | <input type="checkbox"/> | <input type="checkbox"/> | <input checked="" type="checkbox"/> | Advisory Board |

## ICMJE Form for Disclosure of Potential Conflicts of Interest

### Section 4. Intellectual Property -- Patents & Copyrights

Do you have any patents, whether planned, pending or issued, broadly relevant to the work?  Yes  No

If yes, please fill out the appropriate information below. If you have more than one entity press the "ADD" button to add a row. Excess rows can be removed by pressing the "X" button.

| Patent?           | Pending?                            | Issued?                  | Licensed?                | Royalties?               | Licensee? | Comments |
|-------------------|-------------------------------------|--------------------------|--------------------------|--------------------------|-----------|----------|
| modified ham test | <input checked="" type="checkbox"/> | <input type="checkbox"/> | <input type="checkbox"/> | <input type="checkbox"/> |           |          |

### Section 5. Relationships not covered above

Are there other relationships or activities that readers could perceive to have influenced, or that give the appearance of potentially influencing, what you wrote in the submitted work?

- Yes, the following relationships/conditions/circumstances are present (explain below):
- No other relationships/conditions/circumstances that present a potential conflict of interest

At the time of manuscript acceptance, journals will ask authors to confirm and, if necessary, update their disclosure statements. On occasion, journals may ask authors to disclose further information about reported relationships.

### Section 6. Disclosure Statement

Based on the above disclosures, this form will automatically generate a disclosure statement, which will appear in the box below.

Dr. Brodsky reports grants from NHLBI, during the conduct of the study; other from Alexion Pharmaceuticals, other from Achillion Pharmaceuticals, other from Apellis Pharmaceuticals, outside the submitted work; .

### Evaluation and Feedback

Please visit <http://www.icmje.org/cgi-bin/feedback> to provide feedback on your experience with completing this form.

## ICMJE Form for Disclosure of Potential Conflicts of Interest

### Instructions

The purpose of this form is to provide readers of your manuscript with information about your other interests that could influence how they receive and understand your work. The form is designed to be completed electronically and stored electronically. It contains programming that allows appropriate data display. Each author should submit a separate form and is responsible for the accuracy and completeness of the submitted information. The form is in six parts.

#### 1. Identifying information.

#### 2. The work under consideration for publication.

This section asks for information about the work that you have submitted for publication. The time frame for this reporting is that of the work itself, from the initial conception and planning to the present. The requested information is about resources that you received, either directly or indirectly (via your institution), to enable you to complete the work. Checking "No" means that you did the work without receiving any financial support from any third party -- that is, the work was supported by funds from the same institution that pays your salary and that institution did not receive third-party funds with which to pay you. If you or your institution received funds from a third party to support the work, such as a government granting agency, charitable foundation or commercial sponsor, check "Yes".

#### 3. Relevant financial activities outside the submitted work.

This section asks about your financial relationships with entities in the bio-medical arena that could be perceived to influence, or that give the appearance of potentially influencing, what you wrote in the submitted work. You should disclose interactions with ANY entity that could be considered broadly relevant to the work. For example, if your article is about testing an epidermal growth factor receptor (EGFR) antagonist in lung cancer, you should report all associations with entities pursuing diagnostic or therapeutic strategies in cancer in general, not just in the area of EGFR or lung cancer.

Report all sources of revenue paid (or promised to be paid) directly to you or your institution on your behalf over the 36 months prior to submission of the work. This should include all monies from sources with relevance to the submitted work, not just monies from the entity that sponsored the research. Please note that your interactions with the work's sponsor that are outside the submitted work should also be listed here. If there is any question, it is usually better to disclose a relationship than not to do so.

For grants you have received for work outside the submitted work, you should disclose support ONLY from entities that could be perceived to be affected financially by the published work, such as drug companies, or foundations supported by entities that could be perceived to have a financial stake in the outcome. Public funding sources, such as government agencies, charitable foundations or academic institutions, need not be disclosed. For example, if a government agency sponsored a study in which you have been involved and drugs were provided by a pharmaceutical company, you need only list the pharmaceutical company.

#### 4. Intellectual Property.

This section asks about patents and copyrights, whether pending, issued, licensed and/or receiving royalties.

#### 5. Relationships not covered above.

Use this section to report other relationships or activities that readers could perceive to have influenced, or that give the appearance of potentially influencing, what you wrote in the submitted work.

#### Definitions.

**Entity:** government agency, foundation, commercial sponsor, academic institution, etc.

**Grant:** A grant from an entity, generally [but not always] paid to your organization

**Personal Fees:** Monies paid to you for services rendered, generally honoraria, royalties, or fees for consulting, lectures, speakers bureaus, expert testimony, employment, or other affiliations

**Non-Financial Support:** Examples include drugs/equipment supplied by the entity, travel paid by the entity, writing assistance, administrative support, etc.

**Other:** Anything not covered under the previous three boxes

**Pending:** The patent has been filed but not issued

**Issued:** The patent has been issued by the agency

**Licensed:** The patent has been licensed to an entity, whether earning royalties or not

**Royalties:** Funds are coming in to you or your institution due to your patent



## ICMJE Form for Disclosure of Potential Conflicts of Interest

### Section 1. Identifying Information

1. Given Name (First Name)  
Solange

2. Surname (Last Name)  
Eloundou

3. Date  
01-February-2018

4. Are you the corresponding author?

Yes  No

Corresponding Author's Name  
Robert Brodsky

5. Manuscript Title

Germline mutations in the alternative pathway of complement predispose to HELLP syndrome

6. Manuscript Identifying Number (if you know it)

99128-INS-CMED-RV-3

### Section 2. The Work Under Consideration for Publication

Did you or your institution **at any time** receive payment or services from a third party (government, commercial, private foundation, etc.) for any aspect of the submitted work (including but not limited to grants, data monitoring board, study design, manuscript preparation, statistical analysis, etc.)?

Are there any relevant conflicts of interest?  Yes  No

### Section 3. Relevant financial activities outside the submitted work.

Place a check in the appropriate boxes in the table to indicate whether you have financial relationships (regardless of amount of compensation) with entities as described in the instructions. Use one line for each entity; add as many lines as you need by clicking the "Add +" box. You should report relationships that were **present during the 36 months prior to publication**.

Are there any relevant conflicts of interest?  Yes  No

### Section 4. Intellectual Property -- Patents & Copyrights

Do you have any patents, whether planned, pending or issued, broadly relevant to the work?  Yes  No



## ICMJE Form for Disclosure of Potential Conflicts of Interest

---

### Section 5. Relationships not covered above

Are there other relationships or activities that readers could perceive to have influenced, or that give the appearance of potentially influencing, what you wrote in the submitted work?

- Yes, the following relationships/conditions/circumstances are present (explain below):
- No other relationships/conditions/circumstances that present a potential conflict of interest

At the time of manuscript acceptance, journals will ask authors to confirm and, if necessary, update their disclosure statements. On occasion, journals may ask authors to disclose further information about reported relationships.

### Section 6. Disclosure Statement

Based on the above disclosures, this form will automatically generate a disclosure statement, which will appear in the box below.

Dr. Eloundou has nothing to disclose.

### Evaluation and Feedback

Please visit <http://www.icmje.org/cgi-bin/feedback> to provide feedback on your experience with completing this form.

## ICMJE Form for Disclosure of Potential Conflicts of Interest

### Instructions

The purpose of this form is to provide readers of your manuscript with information about your other interests that could influence how they receive and understand your work. The form is designed to be completed electronically and stored electronically. It contains programming that allows appropriate data display. Each author should submit a separate form and is responsible for the accuracy and completeness of the submitted information. The form is in six parts.

#### 1. Identifying information.

#### 2. The work under consideration for publication.

This section asks for information about the work that you have submitted for publication. The time frame for this reporting is that of the work itself, from the initial conception and planning to the present. The requested information is about resources that you received, either directly or indirectly (via your institution), to enable you to complete the work. Checking "No" means that you did the work without receiving any financial support from any third party -- that is, the work was supported by funds from the same institution that pays your salary and that institution did not receive third-party funds with which to pay you. If you or your institution received funds from a third party to support the work, such as a government granting agency, charitable foundation or commercial sponsor, check "Yes".

#### 3. Relevant financial activities outside the submitted work.

This section asks about your financial relationships with entities in the bio-medical arena that could be perceived to influence, or that give the appearance of potentially influencing, what you wrote in the submitted work. You should disclose interactions with ANY entity that could be considered broadly relevant to the work. For example, if your article is about testing an epidermal growth factor receptor (EGFR) antagonist in lung cancer, you should report all associations with entities pursuing diagnostic or therapeutic strategies in cancer in general, not just in the area of EGFR or lung cancer.

Report all sources of revenue paid (or promised to be paid) directly to you or your institution on your behalf over the 36 months prior to submission of the work. This should include all monies from sources with relevance to the submitted work, not just monies from the entity that sponsored the research. Please note that your interactions with the work's sponsor that are outside the submitted work should also be listed here. If there is any question, it is usually better to disclose a relationship than not to do so.

For grants you have received for work outside the submitted work, you should disclose support ONLY from entities that could be perceived to be affected financially by the published work, such as drug companies, or foundations supported by entities that could be perceived to have a financial stake in the outcome. Public funding sources, such as government agencies, charitable foundations or academic institutions, need not be disclosed. For example, if a government agency sponsored a study in which you have been involved and drugs were provided by a pharmaceutical company, you need only list the pharmaceutical company.

#### 4. Intellectual Property.

This section asks about patents and copyrights, whether pending, issued, licensed and/or receiving royalties.

#### 5. Relationships not covered above.

Use this section to report other relationships or activities that readers could perceive to have influenced, or that give the appearance of potentially influencing, what you wrote in the submitted work.

#### Definitions.

**Entity:** government agency, foundation, commercial sponsor, academic institution, etc.

**Grant:** A grant from an entity, generally [but not always] paid to your organization

**Personal Fees:** Monies paid to you for services rendered, generally honoraria, royalties, or fees for consulting, lectures, speakers bureaus, expert testimony, employment, or other affiliations

**Non-Financial Support:** Examples include drugs/equipment supplied by the entity, travel paid by the entity, writing assistance, administrative support, etc.

**Other:** Anything not covered under the previous three boxes

**Pending:** The patent has been filed but not issued

**Issued:** The patent has been issued by the agency

**Licensed:** The patent has been licensed to an entity, whether earning royalties or not

**Royalties:** Funds are coming in to you or your institution due to your patent

## ICMJE Form for Disclosure of Potential Conflicts of Interest

### Section 1. Identifying Information

1. Given Name (First Name)

Xuan

2. Surname (Last Name)

Yuan

3. Date

30-January-2018

4. Are you the corresponding author?

Yes  No

Corresponding Author's Name

Robert Brodsky

5. Manuscript Title

Germline mutations in the alternative pathway of complement predispose to HELLP syndrome

6. Manuscript Identifying Number (if you know it)

99128-INS-CMED-RV-3

### Section 2. The Work Under Consideration for Publication

Did you or your institution **at any time** receive payment or services from a third party (government, commercial, private foundation, etc.) for any aspect of the submitted work (including but not limited to grants, data monitoring board, study design, manuscript preparation, statistical analysis, etc.)?

Are there any relevant conflicts of interest?  Yes  No

### Section 3. Relevant financial activities outside the submitted work.

Place a check in the appropriate boxes in the table to indicate whether you have financial relationships (regardless of amount of compensation) with entities as described in the instructions. Use one line for each entity; add as many lines as you need by clicking the "Add +" box. You should report relationships that were **present during the 36 months prior to publication**.

Are there any relevant conflicts of interest?  Yes  No

### Section 4. Intellectual Property -- Patents & Copyrights

Do you have any patents, whether planned, pending or issued, broadly relevant to the work?  Yes  No

## ICMJE Form for Disclosure of Potential Conflicts of Interest

---

### Section 5. Relationships not covered above

Are there other relationships or activities that readers could perceive to have influenced, or that give the appearance of potentially influencing, what you wrote in the submitted work?

- Yes, the following relationships/conditions/circumstances are present (explain below):
- No other relationships/conditions/circumstances that present a potential conflict of interest

At the time of manuscript acceptance, journals will ask authors to confirm and, if necessary, update their disclosure statements. On occasion, journals may ask authors to disclose further information about reported relationships.

### Section 6. Disclosure Statement

Based on the above disclosures, this form will automatically generate a disclosure statement, which will appear in the box below.

Nothing to disclose.

### Evaluation and Feedback

Please visit <http://www.icmje.org/cgi-bin/feedback> to provide feedback on your experience with completing this form.

Itemized responses to reviewer comments:

Reviewer A:

**Comment: Pooling HPC and TTP may be useful to increase numbers in the control group, but is suboptimal, somewhat contrived.**

*Response: Pooling of the HPC and TTP groups was done to create a “TMA during pregnancy” control group for comparison to HELLP syndrome. It was not our intention to misrepresent the data, and we presented the data both with and without pooling in the manuscript text. We have now added this data to Tables 5 and 6, and made it more prominent in the results section of the manuscript (page 7 lines 22-24 and page 8 lines 21-22).*

**Comment: HELLP vs composite control is the only statistically convincing comparison. “No difference” between HELLP and aHUS cohorts is weak, based on small numbers.**

*Response: We appreciate the reviewer’s critique and concur that a major limitation of this study is the small sample sizes of the patient groups. We now state this in the discussion (page 10 line 24). However, both HELLP and aHUS are rare diseases and our study is the largest prospective analysis of HELLP syndrome to date.*

**Comment: Restricting the analysis to rare variants is not necessarily the best way to enrich for functionally important variants and seems arbitrary or needlessly blunt. For example, activated protein C resistance (FV Leiden) is quite common, and pathogenic. Some common variants in APC genes must have been studied functionally. Could be interesting to include all variants and analyze based on known or predicted functional consequences, then discuss as appears useful.**

*Response: We thank the reviewer for this comment and agree that one of the disadvantages of the methodology we used to perform variant calling is the loss of some potentially functional variants. We chose a more stringent analysis of our sequencing data in order to minimize false positive calls (ie non-pathogenic variants) in an unbiased manner, similar to published reports for aHUS (ie Thergaonkar et al., 2017). Further, most known variants have not been studied functionally, or have only been studied with in vitro assays of unclear clinical relevance such as erythrocytes. A single membrane attack complex is sufficient to lyse erythrocytes; nucleated cells (e.g, endothelial cells) require multiple membrane attack complexes to kill the cell. In future studies with larger patient groups, it may be possible to apply a less stringent methodology as suggested.*

**Comment: claiming a PPV of 100% is not convincing. With such small numbers, the confidence intervals around the “100%” value must be large, but were not mentioned.**

*Response: We thank the reviewer for this comment and agree that that the small sample sizes in our study make these predictions less reliable. We have removed these statistical calculations from the manuscript and now report only the data in the discussion (page 10, lines 11-16).*

Reviewer B:

**Comment: While the authors state that complement levels increase in pregnancy, what information is available concerning complement activation in normal pregnancy? And what is known about the effects of normal pregnancy on levels of complement regulatory proteins?**

1 **Germline mutations in the alternative pathway of complement predispose to HELLP**  
2 **syndrome**

3 \*Arthur J. Vaught<sup>1</sup>, \*Evan M. Braunstein<sup>2</sup>, Jagar Jasem<sup>2</sup>, Xuan Yuan<sup>2</sup>, Igor Makhlin<sup>2</sup>, Solange  
4 Eloundou<sup>1</sup>, Andrea C. Baines<sup>2</sup>, Samuel A. Merrill<sup>2</sup>, Shruti Chaturvedi<sup>2</sup>, Karin Blakemore<sup>1</sup>, C.  
5 John Sperati<sup>3</sup>, Robert A. Brodsky<sup>2</sup>

6 \*Contributed equally

7 1 Division of Maternal Fetal Medicine, Department of Gynecology and Obstetrics

8 2 Division of Hematology, Department of Medicine

9 3 Division of Nephrology, Department of Medicine,

10 Johns Hopkins University School of Medicine, Baltimore, MD 21205

11

12 Corresponding Author:

13 Robert A. Brodsky

14 Ross Research Building, Room 1025

15 Johns Hopkins University School of Medicine

16 720 Rutland Avenue

17 Baltimore, Maryland USA 21205

18 Phone: 410-502-2546

19 Fax: 410-955-0185

20 Email: [rbrodsky@jhmi.edu](mailto:rbrodsky@jhmi.edu)

21

22 Conflict of interest statement: RAB is currently has served as an Alexion Pharmaceuticals

23 Scientific Advisory Board member, an Achillion Pharmaceuticals Scientific Advisor (or

24 consultant), and an Apellis Pharmaceuticals Scientific Advisor (or consultant).

25

*Response: We have specified the complement proteins that increase during normal pregnancy in the discussion (page 11 lines 10-15), and have added an additional reference of primary data. Thus, we now include 5 references to support this statement.*

**Comment: For readers unfamiliar with HELLP and partial HELLP criteria, a table listing these would be useful in understanding the MS.**

*Response: We agree and have added a table with HELLP criteria to the supplemental data (Table S1).*

**Comment: Were any of the placentas of HELLP patients examined after terminations or post-partum? What is known concerning the expression of complement regulatory proteins in the placental trophoblast or other placental cells? IF assessed in this study, was there evidence of increased complement degradation products in these placentas? Does this correlate with mHAM testing.**

*Response: All placentas were sent to pathology for clinical examination for diagnosis HELLP syndrome. Gross pathology revealed unremarkable placentas and non-specific findings, i.e., inflammation, thrombohematomas which can be associated with both labor and manual placental extraction from the uterus. No immunohistochemistry for complement was performed on these specimens so we unfortunately are not able to assess whether or not it correlated with mHam testing. We agree that this would be interesting to investigate going forward.*

**Comment: Did HELLP resolve after delivery in the patients who had terminations? This is generally thought to occur but is not always the case. Does positivity in the mHAM predict response to termination?**

*Response: HELLP resolved in all patients post-partum, consistent with our hypothesis that pregnancy is an important trigger for disease onset. This information has been added to the results (page 7 lines 6-8). We are unable to conclude whether mHam positivity predicts response to termination.*

**Comment: Does the low incidence of mHAM positivity in partial HELLP suggest a different pathophysiology than HELLP per se?**

*Response: Based on our data of a high prevalence of mHAM positivity and/or a rare germline variant in a gene that regulates the APC in HELLP patients, we feel that a large percentage of HELLP is driven by over-activation of the APC. However, we remain open to the likelihood that not all HELLP is driven by complement. It is even more likely that there are alternative causes of partial HELLP. Certainly there are cases of "aHUS" that don't respond to eculizumab or are mHam negative, also implying other pathophysiologies in some cases of aHUS. We have now commented on this in the discussion (page 10, lines 25-6, page 11 lines 1-3).*

**Comment: What is the incidence of positive mHAM in patients with CFHR1/CHFR3 deletion-would H5 not be expected to be positive?**

*Response: There are 2 mHam positive patients with only this variant in the aHUS cohort. However, CFHR1/CHFR3 deletion alone does not appear to produce mHam positivity (as evidenced by multiple pHELLP samples with this variant and a negative mHam). The reason for mHam negativity in case H5 is*

*unclear; clarification has been added to the results (page 9, lines 19-21).*

**Comment: Some increased background information on the reason for terminations would be useful. To my knowledge, SGA per se is usually not an indication. Or were there other maternal factors that led to termination--and most importantly did they all improve afterwards?**

*Response: The reviewer is correct, SGA alone is not an indication for termination of pregnancy. However, in the setting of worsening of the maternal condition secondary to HELLP syndrome along with a fetus less than 500 grams, current recommendations are to offer termination of pregnancy. The fetus, even if above 23-24 weeks gestation, would be considered non-viable in the setting of fetal growth restriction or fetal weight less than 500 grams. In all cases, reasons for termination are provided in the manuscript, and no other factors were involved. This has been clarified in methods section (page 16, lines 14-16).*

**Comment: It is interesting that the positive mHAMs in some of the HPCs were attributed to increased complement levels in normal pregnancy. To what degree must this occur to cause a positive mHAM?**

*Response: The mHam is a functional assay that measures that ability of a nucleated cell to regulate complement. Similar to a thrombin time, the test is qualitative and not quantitative. For example, patients with 60% killing don't necessarily have more severe disease than patients with 25% killing (page 7, lines 19-22). Our previous studies have shown that virtually all healthy control subjects are negative in the mHam (< 20.5%). As stated in references 9 and 27, complement activation increases in the second and third trimesters of pregnancy; thus, it is not surprising to us that some healthy pregnant females have a false positive mHam. Moreover, we have previously demonstrated in aHUS that some patients remain positive in the mHam even after achieving remission and discontinuing eculizumab. This clearly fits with a two-hit hypothesis for aHUS (predisposing mutations leading to increased complement activation combined with a strong complement trigger to produce the onset of disease). Thus, a positive mHam by itself does not define aHUS or HELLP. Rather, the mHam is positive in most cases of aHUS and HELLP. These may be the best patients to be considered for future clinical trials of complement inhibition.*

Reviewer C:

**Comment: The authors have already published a similar paper (Exp. Hem. 2016-Ref 13) in which they describe roughly similar number of patients – probably the same cohort plus a few additional cases. Please discuss.**

*Response: We appreciate the reviewers concern regarding our patient cohorts. This was a prospective study, and no patients enrolled were previously analyzed. The dates of participant recruitment are now stated in the results and methods to address this reasonable concern (page 14, line 3, 7-8, 10-11).*

**Comment: The new data are that the investigators performed TDS on 9 genes in these three patient populations (HELLP, aHUS, partial HELLP) and in a control group. Thus, I presume that the clinical descriptions are of the same patient populations as previously published? In any case, the numbers unfortunately remain small. The sample size appears to be is inadequate to make solid conclusions.**

*Response: Similar to reviewer A, we appreciate the limitations of our study and have added this to the discussion (page 10, line 24). Clinical descriptions of all patient groups are provided in Tables 1-4. The HELLP patients described are new patients as described above.*

**Comment: Another problem is the so-called “mHam” assay. For example, about 50% of the HELLP**



patients had a normal mHam test. Moreover, two controls had very high mHam for which no explanation is provided – just speculation. This should be investigated.

**Comment:** How do the authors explain that only 5/11 HELLP pts and 3/14 partial HELLP pts but 2/17 control pts have a positive mHam test? Further, HPC group has 42% and about 90% cell killing. This makes no sense whatsoever.

*Response:* We appreciate the reviewer's critique and have reinforced in the manuscript that HELLP syndrome may have other etiologies (see response above and page 10 lines 24-26, page 11 lines 1-3). We found that 62% of HELLP patients (and ~20% of partial HELLP patients) had a positive mHam test, supporting the hypothesis that complement is highly activated and a potential driver of disease in most cases of classical HELLP; the etiology of partial HELLP is likely more heterogeneous. The numbers above quoted by the reviewer appear to refer to the incidence of rare variants (not mHam positivity). We find that germline variants in APC genes are present in HELLP patients at a similar incidence to that of patients with aHUS. Remember, only 40-50% of aHUS patients harbor rare variants in APC related genes yet the overwhelming majority are mHam positive and respond to terminal complement inhibition.

**Comment:** The authors also show that ~50% of HELLP patients have a complement AP defect analogous to those observed in aHUS. However, again only a fraction of these patients have an abnormal mHam test. It is a problematic test for several reasons (see below). Critically, in the current series we are not provided with antigenic levels of the plasma proteins or flow data on the membrane proteins. We are missing these data. The workup should consist of quantitative levels (Is haploinsufficiency present?) If not, then functional assessments are necessary if the antigenic levels are normal. Missing data. The authors should prepare the mutant proteins in question, determine if they are expressed by their cell line, and, if so, then perform C3b binding and cofactor activity analyses.

As noted above, the mHam is a problem (Fig 1). The cutoff is 20.5%. About 50% of the HELLP patients fall in the normal range. Further, the mean, for example, of the HELLP patients is ~22%. Thus, mHam as currently structured is just not robust enough for the job, as is evident by visual inspection of Fig 1. In sum, the separation of HELLP from controls is such that it is inadequate to make conclusive statements about a variant. It needs to be correlated with protein measurements, and, most importantly, expression of the purified protein combined with more standard functional assays.

*Response:* The mHam assesses complement activation on the surface of a nucleated cell as a measure of relative cell death. It is a binary assay. The magnitude of cell killing does not directly correlate to the severity of the TMA (see response above). Thus, statistical analysis was performed using the mHam as a binary measure (positive or negative). This is now stated in the results (page 7, lines 19-22). In addition, we have modified Figure 1 in an attempt to display the data in a more clear and transparent fashion. Each data point is shown, with the median and interquartile range given, allowing for the visualization of the subset of HELLP syndrome cases which are mHam positive.

The majority of variants identified in our HELLP and partial HELLP cohorts were nonsense frameshift mutations or homozygous deletions, which are presumed to result in loss of protein expression. While the SNVs identified in our study could potentially be tested using standard functional assays, these generally make use of non-nucleated cells (ie sheep red blood cells) to test for complement activation. We agree with the reviewer that a major challenge in this field is assigning function to variants (common and uncommon). This is especially difficult for soluble factors such as CFH, C3 and CFHR. Red cell assays have been used to assign function, but are problematic. A single membrane attack complex landing on a red cell is sufficient to induce cell lysis. A major reason for developing the mHam is that we and others have found erythrocytes to be too sensitive for assigning functional significance. The

target organs in aHUS, HELLP, TTP, etc are chiefly nucleated endothelial cells. It takes scores of membrane attack complexes to permanently damage these cells. We originally developed the mHam using endothelial cells but showed that the TF1 line was a good surrogate and much easier to work with since it is a non-adherent cell-line (ref 20).

Thus, protein levels and functional assays, including the mHam, are imperfect. By using an assay that assesses complement resilience of nucleated cells and limiting variant calls to those present in less than 1% of the population, we feel we are likely underestimating the percentage of HELLP patients whose disease is driven by the APC. Nevertheless, applying these stringent criteria to healthy controls and/or disease related controls (TTP) we were able to show that the majority of patients with HELLP have levels of complement activation that turns the mHam positive and that rare variants of the APC are over-represented in this population compared to controls. The ultimate proof for this hypothesis will be to do a randomized controlled trial of complement inhibition in HELLP (beyond the scope of this paper); however, our manuscript provides the framework for performing such a study in the future.

**Comment: Also, these data are in contrast to a larger HELLP series (33 patients) that were sequenced and only ~10% had a rare genetic variant – two in FI and one in MCP. (This paper is not noted by the authors – Cravetto, et al. “The genetics of the AP of complement in the pathogenesis of HELLP Syndrome”. The Journal of Maternal-fetal Medicine 2012:25, 2322-28). Also, the authors do not reference one of the early reports connecting complement system to HELLP (Blood 2008, Fang et al). Of course, the mHam test does not test for CD46 variants. A larger number of patients needs to be evaluated and by more standard and accepted functional tests of FH, FI and CD46.**

*Response: We agree with the reviewer that these are important contributions to the literature. A major difference between our study and that of Cravetto et al. is that our study was prospective while this French study was retrospective where virtually all the participants were white. Moreover, Cravetto et al. included a number of participants with SLE and APLS. The discrepancy in incidence of genetic variants may also be explained by differences in methodology. Cravetto et al. used Sanger sequencing to identify variants in 5 genes (compared to 9 in our study). Using these methods, we would have identified germline variants in 1 HELLP patient (8%) and 2 pHELLP patients (14%). This work is now referenced in the discussion (ref 18).*

1 **Abstract**

2 Background: HELLP syndrome is a severe variant of hypertensive disorders of pregnancy  
3 affecting approximately 1% of all pregnancies, and has significant maternal and fetal morbidity.  
4 Previously, we showed that HELLP syndrome has upregulation of the alternative pathway of  
5 complement (APC). We hypothesize HELLP syndrome follows a “two-hit” disease model similar  
6 to atypical hemolytic uremic syndrome (aHUS), requiring both genetic susceptibility and an  
7 environmental risk factor. Our objective was to perform a comparative analysis of the frequency  
8 of APC activation and germline mutations in affected women and to create a predictive model  
9 for identifying HELLP syndrome.

10 Methods: Pregnant women with HELLP syndrome, and healthy controls after 20 weeks  
11 gestation were recruited, along with aHUS and thrombotic thrombocytopenia purpura  
12 participants. We performed a functional assay, the mHam, and targeted genetic sequencing in  
13 all groups.

14 Results: Significantly more participants with rare germline mutations in APC genes were present  
15 in the HELLP cohort compared to controls (46% versus 8%,  $p = 0.01$ ). In addition, significantly  
16 more HELLP participants were positive for the mHam when compared to controls (62% versus  
17 16%,  $p = 0.009$ ). Testing positive for both a germline mutation and the mHam was highly  
18 predictive for the diagnosis of HELLP syndrome.

19 Conclusion: HELLP syndrome is characterized by both activation of the APC and frequent  
20 germline mutations in APC genes. Similar to aHUS, treatment via complement inhibition to  
21 mitigate maternal and fetal morbidity and mortality may be possible.

22 Funding: National Heart Lung and Blood Institute T32HL007525 R01HL133113.

23

24

25

1 **Introduction**

2 Preeclampsia is a devastating multisystem disorder of pregnancy that occurs in 3-5% of  
3 all pregnancies, manifesting as hypertension with or without proteinuria and/or end organ  
4 damage. Notably, not only does preeclampsia account for maternal morbidity, but it also  
5 accounts for 30% of all preterm deliveries, which results in neonatal intensive care unit  
6 admissions, increased health care costs, severe neonatal morbidity, and neonatal mortality (1-  
7 3). HELLP (hemolysis, elevated liver enzymes, and low platelets) syndrome is the most severe  
8 variant of this disorder, and affects approximately 1% of all pregnancies (4). While thought to  
9 be due to endothelial cell dysfunction, the precise etiology of both preeclampsia and HELLP  
10 syndrome remains unclear, resulting in treatment with supportive regimens such as fetal  
11 monitoring, steroids for fetal lung maturity, magnesium for seizure prophylaxis, management of  
12 hypertension and ultimately delivery that results in iatrogenic preterm birth (1, 5-7). Furthermore,  
13 the diagnostic criteria for HELLP syndrome are ambiguous, with two distinct sets of criteria  
14 (Mississippi and Tennessee) based on clinical testing that can be confused by differences in  
15 laboratory assays (8).

16 Complement plays a crucial role in host immunity secondary to the opsonization of  
17 pathogens, the recruitment and activation of inflammatory cells, and the initiation of membrane  
18 attack complexes (MAC) (9, 10). It consists of an enzymatic cascade of over 30 proteins which  
19 are activated by the classical pathway, the lectin pathway, and the alternative pathway (9) .  
20 While the classical pathway depends on antigen-antibody complexes (i.e., lupus) for activation,  
21 the alternative pathway of complement (APC) is antibody independent and has various triggers  
22 including infection, trauma, and pregnancy (11) . In disease states, dysregulation of the APC is  
23 frequently secondary to inactivation of regulatory proteins, resulting in amplification loops that  
24 increase pro-inflammatory cytokines and activation of C3 and C5, leading to an increase in  
25 formation of MAC and subsequent endothelial damage.

1        Although integral in host survival, the over-activation of complement can cause highly  
2 morbid diseases, exemplified by atypical hemolytic uremic syndrome (aHUS). aHUS is caused  
3 by APC dysregulation and presents with signs of thrombocytopenia, hemolytic anemia, acute  
4 kidney injury, hypertension, and neurologic abnormalities, a clinical presentation phenotypically  
5 similar to HELLP syndrome (12, 13). Heterozygous germline mutations in genes that function in  
6 the APC are found in approximately 50% of aHUS patients, leading to loss-of-function of  
7 complement inhibitors or occasionally gain-of-function in complement activators. Mutations in  
8 APC genes have also been identified in small cohorts of patients with preeclampsia and HELLP  
9 syndrome (14-21) . While genetic alterations confer susceptibility to disease in aHUS, an  
10 additional risk factor, or “trigger”, is required for disease onset (12) . Importantly, treatment with  
11 terminal complement inhibitors such as eculizumab are effective in treating aHUS (22).

12        Previously, we assessed activation of the APC in patients with HELLP syndrome using the  
13 modified Ham (mHam) test (13). This assay measures the ability of a patient’s serum to induce  
14 cell death of cells sensitive to complement activity due to a lack of glycosylphosphatidylinositol  
15 (GPI) proteins. Without GPI, the cells cannot anchor crucial complement regulator proteins of  
16 the APC to their membrane, such as CD55 and CD59, and are unable to regulate complement  
17 activation (20). Thus, the mHam is a functional assay that can be used to delineate diseases of  
18 APC dysregulation, and has been validated in its ability to distinguish aHUS from thrombotic  
19 microangiopathies (TMA) that have similar clinical presentations but differ in pathophysiology  
20 (13, 20). We previously reported that like aHUS, a majority of HELLP syndrome patients display  
21 dysregulation of the APC in their serum, evidenced by increased cell killing in the mHam assay  
22 (13).

23        Based on our data, we hypothesized that HELLP syndrome follows a “two-hit” disease  
24 model similar to aHUS, requiring both a germline susceptibility mutation as well as an  
25 environmental risk factor (pregnancy). Here, we show that the APC is more likely to be active in  
26 the serum of patients with HELLP syndrome compared to healthy pregnant females. In addition,

1 we find that patients with HELLP syndrome harbor germline mutations in APC genes at a similar  
2 prevalence to that seen in aHUS. We envision this information to be useful in identifying women  
3 that have APC dysregulation that may respond to complement inhibition much like other  
4 diseases of the APC.

5

6

7

8

9

10

11

12

13

14

15

16

17

18

19

20

21

22

23

24

25

26

## 1 **Results**

### 2 *Participant Demographics*

3 To test our hypothesis, women with HELLP syndrome, partial HELLP syndrome, and healthy  
4 pregnant controls were recruited from 2015 to 2016. Our cohort consisted of 13 participants with  
5 HELLP syndrome (H1-H13, Table 1), 14 participants with partial HELLP syndrome (pH1-pH14,  
6 Table 2), and 19 healthy pregnant controls (HPC1-HPC19, Table 3). In order to compare these  
7 cohorts to patients with TMA, we also recruited 18 participants diagnosed with aHUS (aHUS1-  
8 aHUS18, Table 4), and 8 participants diagnosed with thrombotic thrombocytopenic purpura  
9 (TTP1-TTP8, Table 4). The participant demographics among HELLP, partial HELLP, and HPC  
10 cohorts did not differ in body mass index (BMI), race, or parity. However, the HELLP group had  
11 a statistically significant younger age when compared to the HPC group (27 versus 32 years,  $p$   
12  $< 0.030$ ) but not when compared to partial HELLP syndrome. We also found that the mean  
13 estimated gestational age (EGA) of HELLP participants was significantly younger compared to  
14 the HPC group (30 versus 37 weeks,  $p < 0.001$ ).

15 HELLP participants had a significantly greater incidence of adverse maternal and/or fetal  
16 events compared to both partial HELLP and HPC groups. Of the HELLP group participants, 7 of  
17 13 (54%) had adverse maternal events. One woman was admitted to the intensive care unit and  
18 required renal replacement therapy for acute renal failure. Five women needed blood  
19 transfusions, and one participant had an eclamptic seizure. In addition, 7 of 13 women (54%)  
20 had adverse fetal events in the HELLP syndrome group. Three participants terminated their  
21 pregnancies secondary to the diagnosis of HELLP syndrome in the setting of a non-viable fetus  
22 (less than 23 weeks and/or estimated fetal weight less than 500 grams). The other 5 fetuses  
23 survived but were diagnosed with fetal growth restriction (FGR) which manifested in the third  
24 trimester.

25 There was one adverse maternal outcome in the partial HELLP group, which was an  
26 eclamptic seizure. Further, 4 of 14 participants (29%) experienced the adverse fetal event of

1 FGR. There were no fetal terminations in the partial HELLP group. In our HPC cohort, there was  
2 one participant who was later diagnosed with preeclampsia (not HELLP or partial HELLP  
3 syndrome). At the time of recruitment, the participant was normotensive without signs or  
4 symptoms of preeclampsia and had an EGA of 38 weeks. She was diagnosed with  
5 preeclampsia at 39 weeks and 5 days and this necessitated induction of labor. There was one  
6 adverse fetal outcome which was FGR in the HPC group. All HELLP or partial HELLP syndrome  
7 resolved post-partum or termination in all cases, and no cases of pregnancy associated aHUS  
8 or TTP were observed.

9

#### 10 *Complement activation in HELLP and aHUS*

11 The mHam assay was performed for all participants with available serum samples in  
12 order to assess activation of the APC. A positive test is defined as > 20.5% cell killing, based on  
13 our previous study suggesting that HELLP patients are positive in the mHam assay (13). In this  
14 analysis, 8 of 13 HELLP participants (62%) were positive, compared to only 2 of 18 participants  
15 (11%) in the HPC group (Figure 1). In addition, only 3 of 14 (21%) partial HELLP participants  
16 were positive in the mHam assay. For participants with aHUS, 15 of 17 (88%) were positive,  
17 while only 1 of 7 participants (14%) with TTP were positive, confirming as expected that the  
18 mHam is a useful discriminator between these two phenotypes (20).

19 While the mHam assesses complement activation as a measure of relative cell death,  
20 the magnitude of a result above the 20.5% threshold has unclear significance and has not been  
21 found to be associated with clinical outcomes. Thus, statistical analysis was performed using  
22 the mHam as a binary measure (positive or negative). When compared to the HPC group,  
23 HELLP syndrome participants were significantly more likely to test positive for the mHam assay  
24 (62% versus 11%,  $p = 0.006$ ) (Table 5). We also generated a control cohort for a TMA during  
25 pregnancy by combining the HPC and TTP groups, as both are expected to have normal  
26 complement regulation, and the TTP participants are a confirmed negative control in our



1 previous study (20). HELLP participants were significantly more likely to test positive in the  
2 mHam assay (62% versus 16%,  $p = 0.009$ ) compared to the composite control cohort. This was  
3 also true for aHUS patients compared to this cohort (88% versus 16%,  $p < 0.001$ ). Conversely,  
4 mHam positivity in the HELLP syndrome and aHUS groups was not significantly different. These  
5 data indicate that HELLP syndrome, similar to aHUS, is marked by activation of complement.

6

### 7 *Identification of rare germline variants in HELLP syndrome*

8         Approximately 50% of aHUS patients harbor germline mutations in genes that regulate  
9 the APC; thus, we performed targeted sequencing of participant DNA to identify germline  
10 variants in 9 genes known to have a functional role in the APC. To minimize the contribution of  
11 likely benign germline polymorphisms, only rare heterozygous germline variants with a minor  
12 allele frequency less than 0.01 (1%) were included in our analysis (detailed in methods). In  
13 addition, homozygous deletion of *CFHR1* and *CFHR3*, reported to occur in approximately 2% of  
14 the population, was included in our analysis due to its association with aHUS and likely  
15 functional significance (21). In our pregnant cohorts, 2 participants in the HELLP syndrome  
16 group and 2 participants in the HPC group did not give consent for gene mutation testing. We  
17 identified a rare germline variant or homozygous deletion in 5 of 11 HELLP participants (46%),  
18 compared to only 3 of 14 partial HELLP participants (21%), and 2 of 17 participants (12%) in the  
19 HPC group (Tables 1-3, Figure 2). Further, in our TMA cohorts, germline variants were found in  
20 10 of 18 participants with aHUS (56%), while no variants were identified any of the 8 TTP  
21 participants (Table 4). When compared to the HPC group alone, there was a non-significant  
22 trend towards the presence of a genetic variant in the HELLP syndrome cohort (46% versus  
23 12%,  $p = 0.07$ ). When compared to the composite controls (combined HPC and TTP groups),  
24 HELLP patients were significantly more likely to have a rare germline variant in an APC gene  
25 (46% versus 8%,  $p = 0.01$ ). In addition, there was no difference between the HELLP syndrome  
26 and aHUS cohorts for the presence of a genetic variant (Table 6).

1 Detailed characteristics of all identified genetic variants, along with pathogenicity  
2 prediction outcomes for single nucleotide variants via three different algorithms, are provided in  
3 Table 7. There were 2 HELLP participants with frameshift mutations, assumed to be loss of  
4 function, and 1 participant with a missense mutation predicted to be pathogenic in 2 out of 3  
5 algorithms. Each of these participants also had a positive mHam test. Another HELLP  
6 participant with a positive mHam test harbored a homozygous deletion of the *CFHR1* gene.  
7 There was one HELLP participant with a negative mHam assay and a germline variant. This  
8 individual (H5) was found to have homozygous deletion of both *CFHR1* and *CFHR3* and carried  
9 a history of HELLP syndrome in a prior pregnancy. Interestingly, homozygous deletion of  
10 *CFHR1* and *CFHR3* was found in 3 participants with partial HELLP, all with negative mHam  
11 tests. One of these participants (pH1) also had a history of HELLP syndrome in a prior  
12 pregnancy. Of note, pH1 was found to have two additional missense variants in other APC  
13 genes as well. There were two HPC participants identified with rare genetic variants, both  
14 negative in the mHam assay. One individual (HPC1) carried a diagnosis of sickle cell trait and  
15 alpha thalassemia and harbored multiple missense mutations, with one predicted to be  
16 pathogenic by all 3 algorithms. By comparison, all aHUS participants with identified germline  
17 variants were also found to be positive in the mHam assay. Two participants were found to have  
18 deletions of both *CFHR1* and *CFHR3*, while 1 participant harbored a deletion of *CFHR1* only.  
19 Deletion of *CFHR* genes were not identified in any HPC or TTP participants, supporting the  
20 functional significance of this variant. However, this variant by itself does not appear to  
21 sufficiently activate the APC in order to produce a positive mHam test.

22  
23  
24  
25  
26

## 1 Discussion

2 In this study, we demonstrate that HELLP syndrome is part of the phenome that results  
3 from germline mutations in genes that regulate the APC. Using phenotypic, functional (mHam  
4 assay demonstrating impaired complement regulation), and genetic (mutations in genes that  
5 regulate the APC) data we found striking similarities to aHUS. Our genetic analysis was limited  
6 to rare germline variants in order to increase the likelihood of identifying pathogenic mutations  
7 that alter the function of APC genes. Using this strict criterion, significantly more APC germline  
8 mutations were identified in the HELLP syndrome cohort compared to controls (46% versus 8%,  
9  $p = 0.01$ ), while no difference was found when compared to aHUS. We also confirmed our  
10 previous data demonstrating that significantly more HELLP participants test positive in the  
11 mHam assay compared to controls (62% versus 16%,  $p = 0.009$ ). Further, we did not identify  
12 any individuals in our control groups that tested positive for both the mHam assay and a  
13 germline variant (0 of 23 HPC and TTP participants, compared to 4 of 11 HELLP participants).  
14 Conversely, both tests were negative in 17 of 23 control participants and only 2 of 11 HELLP  
15 participants. Thus, this combination of testing may identify individuals with HELLP syndrome  
16 who could potentially benefit from therapeutic intervention.

17 Our findings agree with previous studies suggesting that complement plays an important  
18 role in the pathophysiology of HELLP. The APC activation fragment Bb was found to be a  
19 predictor of acquiring preeclampsia (23). In addition, a prospective study of 40 pregnant women  
20 with lupus and/or antiphospholipid antibodies who developed preeclampsia identified 7 (17.5%)  
21 that had germline heterozygous mutations likely to be deleterious in *MCP*, *CFI* or *CFH* (14).  
22 Other studies have performed targeted sequencing of various APC genes in patients with  
23 HELLP syndrome and identified heterozygous mutations in 9% to 36% of cases (18, 19).

24 The major limitation of this study is the small sample sizes of the participant groups.  
25 Further, multiple HELLP and partial HELLP participants tested negative for APC activation in the  
26 mHam assay. The most likely explanation for this finding is that the pathophysiology of HELLP

1 syndrome (and partial HELLP even more so) is due to multiple factors. However, this study  
2 builds on our previous data and that of others demonstrating that a significant subset of HELLP  
3 syndrome is due to a reduced ability to regulate the APC, analogous to aHUS (13, 18, 20).  
4 Indeed, the clinical manifestations of hypertension, renal insufficiency, thrombocytopenia,  
5 elevated LDH, elevated AST, and even the presence of schistocytes are common to both  
6 disorders. Roughly 50% of aHUS patients harbor germline mutations, usually heterozygous, that  
7 increase susceptibility of endothelial cells to injury from activated complement (12, 15, 16).  
8 These patients are often asymptomatic for decades until they encounter a strong complement  
9 “trigger” such as major surgery, infection, malignancy, autoimmunity, or pregnancy. In HELLP  
10 syndrome, pregnancy is the likely trigger (11). Previous studies have shown that complement  
11 proteins such as CFH and C5b-9, as well as associated contributors of increased complement  
12 (i.e. c-reactive protein) are significantly increased during pregnancy, possibly explaining why  
13 phenotypic manifestations of HELLP syndrome almost exclusively occur in the late second or  
14 third trimester (9, 24-27). This may also explain why two cases in the HPC cohort tested positive  
15 in the mHam assay.

16 In our cohort, HELLP syndrome participants were associated with more frequent  
17 adverse maternal and fetal outcomes compared to the partial HELLP syndrome or HPC  
18 participants. Women with HELLP syndrome are more likely to have increased morbidity and  
19 mortality secondary to DIC and hepatic rupture compared to other hypertensive disorders of  
20 pregnancy (28, 29). However, 6 of the 7 women with HELLP syndrome who had maternal  
21 adverse events were either positive by the mHam assay or had a rare variant in an APC gene.  
22 Our data suggest that the increased morbidity or mortality in HELLP syndrome is associated  
23 with dysregulation of the APC. In the partial HELLP group, there was only one participant (pH6)  
24 with an adverse maternal outcome (an eclamptic seizure); she was also positive in the mHam  
25 indicating increased APC activation. There was one participant in the HPC group with a  
26 negative mHam and genetic analysis who was later diagnosed with preeclampsia.

1           In the HELLP group there were 7 participants who had adverse fetal outcomes, 3 of  
2           which were terminations of pregnancy secondary to early gestational age and fetal weight less  
3           than 500 grams at time of diagnosis. Two of these had either a positive mHam or a rare  
4           germline variant. In the partial HELLP group there were 4 participants with adverse fetal  
5           outcomes, all of whom had either a positive mHam test or a rare germline variant, further  
6           indicating that abnormal complement regulation is associated with both poor maternal and fetal  
7           outcomes. There were 2 HPC participants with positive mHam assays, potentially secondary to  
8           the normal upregulation of the complement system during pregnancy, particularly in the third  
9           trimester (9). Further, there were 2 HPC participants with rare variants of the APC. Similar to  
10          multiple other genetic diseases (hemochromatosis, for example), rare variants of the APC are  
11          associated with incomplete penetrance and variable expressivity (30-35). Therefore, genetic  
12          variants are best characterized as risk factors, with disease onset occurring in the setting of  
13          additional environmental stress causing complement activation.

14          Our findings have important clinical implications for the diagnosis and treatment of  
15          HELLP syndrome. Reliable biomarkers and genetic mutations that predispose to disease states  
16          are critical for planning future clinical trials and for targeted approaches to therapy. Paroxysmal  
17          nocturnal hemoglobinuria (PNH) and aHUS are diseases caused by mutations that predispose  
18          cells to complement-mediated destruction (16, 36-38). Both of these conditions are dramatically  
19          and rapidly improved by blocking terminal complement with the humanized monoclonal  
20          antibody, eculizumab (22, 39-41). Prior to FDA approval of eculizumab, pregnancy was  
21          relatively contraindicated in PNH due to excessive complement activation that increased fetal  
22          and maternal mortality. Eculizumab is now routinely recommended for PNH patients who  
23          become pregnant since the drug does not effectively cross the placenta or enter the breast milk  
24          (42). Complement inhibition has also greatly improved the outcome of patients with aHUS.  
25          Recent studies in aHUS show that this treatment can be safely discontinued in most patients  
26          once a complete remission is achieved and the complement trigger has resolved (43). Our study

1 confirms that aHUS and HELLP share similar pathophysiology. Indeed, there is a case report of  
2 eculizumab treatment leading to clinical improvement and prolongation of pregnancy in a patient  
3 with HELLP syndrome (44). Furthermore, we previously demonstrated that C5 inhibition can  
4 effectively block complement-mediated killing in HELLP serum *in vitro* (13). Currently, HELLP  
5 syndrome is most effectively managed by delivering the fetus (removal of the complement  
6 trigger); however, in cases of early gestational age (before 28 weeks) there is a high risk of fetal  
7 mortality and maternal morbidity (1). Based on our data and that of others, we suggest that  
8 future trials of complement inhibition in HELLP syndrome include genetic testing and the mHam  
9 assay to firmly establish the diagnosis. Patients with HELLP syndrome diagnosed prior to 28  
10 weeks gestational age may benefit from this therapeutic intervention to allow the fetus to reach  
11 a safer gestational age and achieve less neonatal morbidity

12 In summary, most HELLP syndrome and likely some preeclampsia, is driven by failure to  
13 regulate the APC. Serologic assays demonstrating a reduced ability to regulate complement  
14 (mHam), germline mutations in genes that regulate the APC, or both, are found in a majority of  
15 patients with HELLP syndrome. While we do not advocate for off-label use of complement  
16 inhibitors in HELLP syndrome, our findings form the basis for the design of clinical trials to test  
17 the efficacy of complement inhibition to reduce perinatal morbidity from early prematurity.

18  
19  
20  
21  
22  
23  
24  
25  
26

## 1 **Methods**

### 2 *Study population and design*

3           We performed a prospective case-controlled study to identify whether HELLP syndrome  
4 is associated with both activation of the APC as well as germline variants in genes that regulate  
5 the APC. We hypothesized that HELLP syndrome patients harboring genetic variants of APC  
6 genes would also display activation of the APC via a functional assay (the mHam). All  
7 participants were recruited from the Johns Hopkins Medical Institute (JHMI), and none had been  
8 studied previously. The Tennessee criteria were used for the diagnosis of HELLP syndrome,  
9 and partial HELLP syndrome was defined by having one or two but not all lab abnormalities of  
10 HELLP syndrome (Table S1) (1, 45). We recruited all participants from November 1, 2015 to  
11 December 31, 2016. Healthy pregnant controls were recruited after 23 weeks gestation, and  
12 were excluded if they had a history of hypertensive disease, complement or microangiopathic  
13 disorder, or autoimmune disease. Blood was collected from all participants at the time of  
14 recruitment by venipuncture of the antecubital vein. Serum was cold centrifuged within 2 hours  
15 of collection at 4 °C and stored at -80°C. Whole blood was used to generate genomic DNA for  
16 targeted gene sequencing using a Qiagen DNeasy blood and tissue kit. All samples were de-  
17 identified and coded prior to laboratory testing. Patients with aHUS were recruited using  
18 standard diagnostic criteria defined by Legendre et al. 2013 (39). Patients with TTP were  
19 recruited following confirmation of the diagnosis via an ADAMTS13 activity less than 10%.

20

### 21 *Modified Ham Assay*

22           The modified Ham assay was performed as previously described (20) . Briefly, PNH-like  
23 (PIGA –null) TF-1 cells were used to assess complement mediated killing via the APC. Cells  
24 were plated in a U-shaped well at a density at 4000 cells and incubated in 20% serum with  
25 Gelatin Veronal Buffer (GVB, Complement Technology, Inc). Each sample was tested in  
26 triplicate for 30 minutes at 37degrees C. After incubation, the supernatant was removed and

1 cell proliferation agent WST-1 (Roche) was added and incubated for 2 hours at 37 degrees C.  
2 Absorbance was measured in an iMark Microplate Absorbance Reader (Bio-Rad, Hercules, CA)  
3 at 490 nm with a reference wave length at 595 nm. Heat inactivated serum was used as a  
4 negative control for each sample. Heat inactivation was performed by incubating the serum at  
5 56 degrees C for 30 minutes. Normal human AB serum (H4522, Sigma-Aldrich) was used as  
6 an internal control of the assay. The percentage of live cells was calculated as the ratio of the  
7 absorbance of each sample divided by the absorbance of the same sample's heat-inactivated  
8 control. The percentage of non-viable cells (cell killing) was calculated as 1 minus this ratio.

9

#### 10 *Targeted sequencing*

11 A custom panel of 9 genes known to function in the alternative pathway of complement  
12 was selected for sequencing using the Illumina TruSeq Custom Amplicon (v1.5). Illumina  
13 DesignStudio software was utilized to generate custom oligonucleotides designed to amplify  
14 exonic regions of the following selected genes: *CFH*, *CFB*, *CFI*, *CFHR1*, *CFHR3*, *CFHR5*, *C3*,  
15 *CD46 (MCP)*, and *THBD*. The panel consisted of 402 amplicons covering a total of 58.3  
16 kilobases (kb) with an overall coverage of 98%. An amplicon library of each patient sample was  
17 generated according to the manufacturer protocol using 250ng genomic DNA as input.  
18 Successful library amplification was verified for a subset of samples by both gel electrophoresis  
19 and Bioanalyzer analysis. This was followed by library normalization and pooling per  
20 manufacturer protocol, and paired-end sequencing on the Illumina MiSeq platform via the  
21 Genetic Resources Core Facility (GRCF) at Johns Hopkins School of Medicine  
22 (<https://grcf.jhmi.edu>). Analysis of raw sequencing data (FASTQ) was performed using the  
23 TruSeq Amplicon application (v2.0.0) via the Illumina BaseSpace platform, aligning to  
24 (GRCh37/hg19) human genome reference. Average base coverage was 377x per sample.  
25 Single nucleotide variants (SNVs) and small indels were identified using Isaac variant caller and  
26 variant call files were filtered using VariantStudio software (v3.0). Variants not passing Illumina's



1 variant quality filters were excluded. The following criteria were used to identify rare germline  
2 SNVs and indels: nonsynonymous coding region variants with a depth >20x, variant allele  
3 frequency between 40-60%, Exome Aggregation Consortium (ExAC v0.3.1) minor allele  
4 frequency < 0.01 in any ethnic population (total of 60,706 samples) and minor allele frequency <  
5 0.01 in the Exome Variant Server (46). Large deletions were determined by complete loss of  
6 signal for multiple consecutive amplicons (Figure S1). All genomic coordinates refer to hg19.

7

### 8 *Adverse Events*

9         The investigators sought to observe any adverse maternal or fetal events in the HELLP  
10 group, partial HELLP group, and HPC group. Maternal adverse events were maternal mortality,  
11 intensive care unit admission, renal failure, blood product transfusion, and eclampsia in HELLP  
12 or partial HELLP groups, or new diagnosis of preeclampsia in a control group. Fetal adverse  
13 events were fetal termination or abortion secondary to diagnosis of HELLP or partial HELLP  
14 syndrome, neonatal mortality, and fetal growth restriction. Other than worsening of HELLP  
15 syndrome in the setting of a non-viable fetus, no other factors were relevant for fetal  
16 terminations. Because neonatal intensive care unit admission in preeclampsia and HELLP  
17 syndrome is usually secondary to iatrogenic preterm birth, we did not include this as an adverse  
18 event in our group.

19

### 20 *Statistics*

21         A one-way ANOVA test with a Bonferroni correction was used to calculate the p-values  
22 for the difference among the means for age, BMI, estimated gestational age in HELLP, partial  
23 HELLP, and the healthy pregnant control groups. Either Chi-squared test or Fisher's exact test  
24 was used to calculate the rest of the p-values provided. A Fisher's exact was used if more than  
25 20% of the expected values in the input cells were less than 5 and/or any individual values had  
26 expected counts of less than 1. Statistical significance for the mHam assay was calculated as a

1 binary value (positive or negative) as the mHam assay is thought to be clinically significant as a  
2 qualitative test. All analyses were performed by using SPSS 18 for Windows/MAC (PASW  
3 Statistics GradPack 18; SPSS, Chicago, IL). All tests were two-sided with a 0.05 level of  
4 significance.

5

#### 6 *Study approval*

7 This study was approved by the Johns Hopkins institutional review board and conducted  
8 according to Declaration of Helsinki principles. Written informed consent was received from all  
9 participants prior to inclusion in the study.

10

#### 11 **Author contributions**

12 AJV and RAB were responsible for the study conception and design. AJV, EMB, RAB, SM, SC,  
13 SE, KB and CJS collected and categorized study participants. AJV, EMB, XY, IM and AB  
14 performed experiments and acquired data. AJV, EMB and RAB analyzed and interpreted the  
15 data. JJ performed statistical data analysis. AJV, EMB, and RAB drafted the manuscript and  
16 performed critical revisions. All authors approved the final version of the manuscript.

17

#### 18 **Acknowledgments**

19 AJV is awarded the Johns Hopkins Meyerhoff Professorship Award and T32HL007525  
20 NIH/NHLBI *Training Program in Hematology*. RAB is awarded the R01HL133113  
21 NIH/NHLBI *Complementopathies: Genotype and Phenotype*. AB who is currently employed at  
22 the FDA, was involved with this study during a previous affiliation with Johns Hopkins School of  
23 Medicine. The views expressed in this paper do not represent the views of the FDA

24

25

1 **References**

- 2 1. Report of the American College of Obstetricians and Gynecologists' Task Force on  
3 Hypertension in Pregnancy. Hypertension in pregnancy: Executive Summary. *Obstetrics and*  
4 *Gynecology*. 2013;122:1122.
- 5 2. Chen XK, Wen SW, Smith GN, Yang Q, Walker MC. New-onset hypertension in late  
6 pregnancy and fetal growth: different associations between singletons and twins. *Hypertens*  
7 *Pregnancy*. 2007;26(3):259-72.
- 8 3. Iacobelli S, Bonsante F, Robillard PY. Pre-eclampsia and preterm birth in Reunion Island: a  
9 13 years cohort-based study. Comparison with international data. *J Matern Fetal Neonatal Med*.  
10 2015 Nov 23:1-6.
- 11 4. Weinstein L. Syndrome of hemolysis, elevated liver enzymes, and low platelet count: a  
12 severe consequence of hypertension in pregnancy. 1982. *Am J Obstet Gynecol*. 2005  
13 Sep;193(3 Pt 1):859; discussion 860.
- 14 5. Fitzpatrick KE, Hinshaw K, Kurinczuk JJ, Knight M. Risk factors, management, and outcomes  
15 of hemolysis, elevated liver enzymes, and low platelets syndrome and elevated liver enzymes,  
16 low platelets syndrome. *Obstet Gynecol*. 2014 Mar;123(3):618-27.
- 17 6. Uzan J, Carbonnel M, Piconne O, Asmar R, Ayoubi JM. Pre-eclampsia: pathophysiology,  
18 diagnosis, and management. *Vasc Health Risk Manag*. 2011;7:467-74.
- 19 7. Martin JN,Jr, Rose CH, Briery CM. Understanding and managing HELLP syndrome: the  
20 integral role of aggressive glucocorticoids for mother and child. *Am J Obstet Gynecol*. 2006  
21 Oct;195(4):914-34.
- 22 8. Martin JN,Jr, Rinehart BK, May WL, Magann EF, Terrone DA, Blake PG. The spectrum of  
23 severe preeclampsia: comparative analysis by HELLP (hemolysis, elevated liver enzyme levels,  
24 and low platelet count) syndrome classification. *Am J Obstet Gynecol*. 1999 Jun;180(6 Pt  
25 1):1373-84.

- 1 9. Richani K, Soto E, Romero R, Espinoza J, Chaiworapongsa T, Nien JK, et al. Normal  
2 pregnancy is characterized by systemic activation of the complement system. *J Matern Fetal*  
3 *Neonatal Med.* 2005 Apr;17(4):239-45.
- 4 10. Haeger M, Unander M, Bengtsson A. Enhanced anaphylatoxin and terminal C5b-9  
5 complement complex formation in patients with the syndrome of hemolysis, elevated liver  
6 enzymes, and low platelet count. *Obstet Gynecol.* 1990 Oct;76(4):698-702.
- 7 11. Fakhouri F, Roumenina L, Provot F, Sallee M, Caillard S, Couzi L, et al. Pregnancy-  
8 associated hemolytic uremic syndrome revisited in the era of complement gene mutations. *J Am*  
9 *Soc Nephrol.* 2010 May;21(5):859-67.
- 10 12. Loirat C, Fremeaux-Bacchi V. Atypical hemolytic uremic syndrome. *Orphanet J Rare Dis.*  
11 2011 Sep 8;6:60.
- 12 13. Vaught AJ, Gavriilaki E, Hueppchen N, Blakemore K, Yuan X, Seifert SM, et al. Direct  
13 evidence of complement activation in HELLP syndrome: A link to atypical hemolytic uremic  
14 syndrome. *Exp Hematol.* 2016 Feb 26.
- 15 14. Salmon JE, Heuser C, Triebwasser M, Liszewski MK, Kavanagh D, Roumenina L, et al.  
16 Mutations in complement regulatory proteins predispose to preeclampsia: a genetic analysis of  
17 the PROMISSE cohort. *PLoS Med.* 2011 Mar;8(3):e1001013.
- 18 15. Noris M, Caprioli J, Bresin E, Mossali C, Pianetti G, Gamba S, et al. Relative role of genetic  
19 complement abnormalities in sporadic and familial aHUS and their impact on clinical phenotype.  
20 *Clin J Am Soc Nephrol.* 2010 Oct;5(10):1844-59.
- 21 16. Noris M, Bresin E, Mele C, Remuzzi G. Genetic Atypical Hemolytic-Uremic Syndrome. In:  
22 Pagon RA, Adam MP, Ardinger HH, Wallace SE, Amemiya A, Bean LJH, et al, editors.  
23 *GeneReviews(R)*. Seattle (WA): University of Washington, Seattle; 1993.
- 24 17. Maga TK, Nishimura CJ, Weaver AE, Frees KL, Smith RJ. Mutations in alternative pathway  
25 complement proteins in American patients with atypical hemolytic uremic syndrome. *Hum Mutat.*  
26 2010 Jun;31(6):1445.

- 1 18. Crovetto F, Borsa N, Acaia B, Nishimura C, Frees K, Smith RJ, et al. The genetics of the  
2 alternative pathway of complement in the pathogenesis of HELLP syndrome. *J Matern Fetal*  
3 *Neonatal Med.* 2012 Nov;25(11):2322-5.
- 4 19. Fakhouri F, Jablonski M, Lepercq J, Blouin J, Benachi A, Hourmant M, et al. Factor H,  
5 membrane cofactor protein, and factor I mutations in patients with hemolysis, elevated liver  
6 enzymes, and low platelet count syndrome. *Blood.* 2008 Dec 1;112(12):4542-5.
- 7 20. Gavriilaki E, Yuan X, Ye Z, Ambinder AJ, Shanbhag SP, Streiff MB, et al. Modified Ham test  
8 for atypical hemolytic uremic syndrome. *Blood.* 2015 Jun 4;125(23):3637-46.
- 9 21. Zipfel PF, Edey M, Heinen S, Jozsi M, Richter H, Misselwitz J, et al. Deletion of complement  
10 factor H-related genes CFHR1 and CFHR3 is associated with atypical hemolytic uremic  
11 syndrome. *PLoS Genet.* 2007 Mar 16;3(3):e41.
- 12 22. Legendre CM, Licht C, Loirat C. Eculizumab in atypical hemolytic-uremic syndrome. *N Engl*  
13 *J Med.* 2013 Oct 3;369(14):1379-80.
- 14 23. Lynch AM, Wagner BD, Giclas PC, West NA, Gibbs RS, Holers VM. The Relationship of  
15 Longitudinal Levels of Complement Bb During Pregnancy with Preeclampsia. *Am J Reprod*  
16 *Immunol.* 2016 Feb;75(2):104-11.
- 17 24. Romem Y, Artal R. C-reactive protein in pregnancy and in the postpartum period. *Am J*  
18 *Obstet Gynecol.* 1985 Feb 01;151(3):380-3.
- 19 25. Ernst GDS, de Jonge LL, Hofman A, Lindemans J, Russcher H, Steegers EAP, et al. C-  
20 reactive protein levels in early pregnancy, fetal growth patterns, and the risk for neonatal  
21 complications: the Generation R Study. *Am J Obstet Gynecol.* 2011 Aug;205(2):12.
- 22 26. Watts DH, Krohn MA, Wener MH, Eschenbach DA. C-reactive protein in normal pregnancy.  
23 *Obstet Gynecol.* 1991 Feb;77(2):176-80.
- 24 27. Derzsy Z, Prohászka Z, Rigó J, Füst G, Molvarec A. Activation of the complement system in  
25 normal pregnancy and preeclampsia. *Mol Immunol.* 2010 Apr;47(7-8):1500-6.

- 1 28. Sibai BM. Diagnosis, controversies, and management of the syndrome of hemolysis,  
2 elevated liver enzymes, and low platelet count. *Obstet Gynecol.* 2004 May;103(5 Pt 1):981-91.
- 3 29. Sibai BM, Ramadan MK, Usta I, Salama M, Mercer BM, Friedman SA. Maternal morbidity  
4 and mortality in 442 pregnancies with hemolysis, elevated liver enzymes, and low platelets  
5 (HELLP syndrome). *Am J Obstet Gynecol.* 1993 Oct;169(4):1000-6.
- 6 30. Richards A, Kathryn Liszewski M, Kavanagh D, Fang CJ, Moulton E, Fremeaux-Bacchi V, et  
7 al. Implications of the initial mutations in membrane cofactor protein (MCP; CD46) leading to  
8 atypical hemolytic uremic syndrome. *Mol Immunol.* 2007 Jan;44(1-3):111-22.
- 9 31. Fremeaux-Bacchi V, Moulton EA, Kavanagh D, Dragon-Durey M, Blouin J, Caudy A, et al.  
10 Genetic and functional analyses of membrane cofactor protein (CD46) mutations in atypical  
11 hemolytic uremic syndrome. *J Am Soc Nephrol.* 2006 Jul;17(7):2017-25.
- 12 32. Esparza-Gordillo J, Jorge EGd, Garrido CA, Carreras L, López-Trascasa M, Sánchez-Corral  
13 P, et al. Insights into hemolytic uremic syndrome: segregation of three independent  
14 predisposition factors in a large, multiple affected pedigree. *Mol Immunol.* 2006  
15 Apr;43(11):1769-75.
- 16 33. Esparza-Gordillo J, Goicoechea de Jorge E, Buil A, Carreras Berges L, López-Trascasa M,  
17 Sánchez-Corral P, et al. Predisposition to atypical hemolytic uremic syndrome involves the  
18 concurrence of different susceptibility alleles in the regulators of complement activation gene  
19 cluster in 1q32. *Hum Mol Genet.* 2005 Mar 01;14(5):703-12.
- 20 34. Papanikolaou G, Papaioannou M, Politou M, Vavatsi N, Kioumi A, Tsiatsiou P, et al. Genetic  
21 heterogeneity underlies juvenile hemochromatosis phenotype: analysis of three families of  
22 northern Greek origin. *Blood Cells Mol Dis.* 2002 Sep-Oct;29(2):168-73.
- 23 35. Piperno A, Sampietro M, Pietrangelo A, Arosio C, Lupica L, Montosi G, et al. Heterogeneity  
24 of hemochromatosis in Italy. *Gastroenterology.* 1998 May;114(5):996-1002.
- 25 36. Hill A, DeZern AE, Kinoshita T, Brodsky RA. Paroxysmal nocturnal haemoglobinuria. *Nat*  
26 *Rev Dis Primers.* 2017 05 18;3:17028.

1 37. Brodsky RA. Complement in hemolytic anemia. *Blood*. 2015 Nov 26;;126(22):2459-65.

2 38. Brodsky RA. Paroxysmal nocturnal hemoglobinuria. *Blood*. 2014 Oct 30;124(18):2804-11.

3 39. Legendre CM, Licht C, Muus P, Greenbaum LA, Babu S, Bedrosian C, et al. Terminal  
4 complement inhibitor eculizumab in atypical hemolytic-uremic syndrome. *N Engl J Med*. 2013  
5 Jun 6;368(23):2169-81.

6 40. Brodsky RA, Young NS, Antonioli E, Risitano AM, Schrezenmeier H, Schubert J, et al.  
7 Multicenter phase 3 study of the complement inhibitor eculizumab for the treatment of patients  
8 with paroxysmal nocturnal hemoglobinuria. *Blood*. 2008 Feb 15;;111(4):1840-7.

9 41. Hillmen P, Young NS, Schubert J, Brodsky RA, Socie G, Muus P, et al. The complement  
10 inhibitor eculizumab in paroxysmal nocturnal hemoglobinuria. *N Engl J Med*. 2006 Sep  
11 21;355(12):1233-43.

12 42. Kelly RJ, Hochsmann B, Szer J, Kulasekararaj A, de Guibert S, Roth A, et al. Eculizumab in  
13 Pregnant Patients with Paroxysmal Nocturnal Hemoglobinuria. *N Engl J Med*. 2015 Sep  
14 10;373(11):1032-9.

15 43. Merrill SA, Brittingham ZD, Yuan X, Moliterno AR, Sperati CJ, Brodsky RA. Eculizumab  
16 cessation in atypical hemolytic uremic syndrome. *Blood*. 2017 May 1.

17 44. Burwick RM, Feinberg BB. Eculizumab for the treatment of preeclampsia/HELLP syndrome.  
18 *Placenta*. 2013 Feb;34(2):201-3.

19 45. Aydin S, Ersan F, Ark C, Arioğlu Aydın C. Partial HELLP syndrome: maternal, perinatal,  
20 subsequent pregnancy and long-term maternal outcomes. *J Obstet Gynaecol Res*. 2014  
21 Apr;40(4):932-40.

22 46. Lek M, Karczewski KJ, Minikel EV, Samocha KE, Banks E, Fennell T, et al. Analysis of  
23 protein-coding genetic variation in 60,706 humans. *Nature*. 2016 08 18;;536(7616):285-91.

24

25

26

1 **Figure Legends**

2 **Figure 1: Modified Ham (mHam) results among all participant groups.** Each participant is  
3 represented as a black circle, and cell killing in the mHAM assay is displayed as a continuous  
4 variable for each participant group. The mean and interquartile range of 25-75% is depicted for  
5 each group. Statistical analysis demonstrating significant differences between groups using the  
6 mHam as a binary measure (positive vs negative) is shown in Table 6. A positive mHam is  
7 defined as cell killing of > 20.5% (dashed black horizontal line).

8

9 **Figure 2: Correlation of germline variants in complement proteins with functional testing.**

10 Each genomic variant is identified by its amino acid consequence along with the result of mHam  
11 testing in that patient. A filled circle or square represents a positive mHam, while an open circle  
12 or square represents a negative test. Patients in which only a single variant was identified are  
13 represented with circles, while patients with more than one variant, are represented with  
14 squares. Each cohort is designated by a unique color (legend). The total number of amino acids  
15 (aa) in each protein are provided. Numbered protein domains denote complement control  
16 protein modules (CCP), other protein domains are as labeled. SRCR, scavenger receptor  
17 cysteine-rich; LDL, low-density lipoprotein; MG, macroglobulin; ANA, anaphylatoxin; TM,  
18 transmembrane;

19

20



**Table 1: HELLP syndrome participants**

| ID  | EGA (wk) | Race  | Age (yr) | BMI  | P   | SBP/DBP                 | Cr (mg/dL) | Highest AST (IU/L) | Highest ALT (IU/L) | Lowest Platelets (mm <sup>3</sup> ) | Pr/Cr | Highest LDH (IU/L) | mHAM (%) | Germline Variant            | Adverse Maternal Events | Adverse Fetal Events |
|-----|----------|-------|----------|------|-----|-------------------------|------------|--------------------|--------------------|-------------------------------------|-------|--------------------|----------|-----------------------------|-------------------------|----------------------|
| H1  | 31.2     | Black | 28       | 34.5 | 0   | <u>169</u> / <u>103</u> | 0.7        | 64                 | 63                 | 85000                               | 0.43  | 431                | 32       | CFHR1 p.L322Rfs*50          | None                    | FGR                  |
| H2  | 26.4     | Black | 21       | 26.9 | 0   | <u>140</u> / <u>80</u>  | 0.9        | 321                | 287                | 50000                               | 3.20  | 867                | 32       | C3 p.G542D                  | None                    | FGR                  |
| H3  | 34.2     | Black | 33       | 28.3 | >2  | <u>204</u> / <u>121</u> | 6.5        | 520                | 86                 | 21000                               | 4.50  | 2030               | 29       | del(CFHR1) homozygous       | MV, RRT                 | None                 |
| H4  | 33       | White | 35       | 22.8 | 0   | <u>141</u> / <u>80</u>  | 0.7        | 1163               | 749                | 28000                               | 1.46  | 1461               | 21       | CFHR5 p.K562Nfs*24          | None                    | None                 |
| H5  | 24       | White | 26       | 30   | >1* | <u>150</u> / <u>72</u>  | 0.7        | 167                | 145                | 100000                              | 0.24  | 574                | 8        | del(CFHR3-CFHR1) homozygous | None                    | Termination          |
| H6  | 17.2     | Black | 24       | 23.8 | 0   | <u>165</u> / <u>109</u> | 1.2        | 84                 | 65                 | 77000                               | 0.32  | 540                | 33       | None                        | PLT                     | Termination          |
| H7  | 38       | White | 32       | 47.1 | 0   | <u>180</u> / <u>100</u> | 0.9        | 420                | 308                | 43000                               | 0.39  | 591                | 30       | None                        | RBC, PLT                | None                 |
| H8  | 24.2     | Black | 22       | 33.6 | 0   | <u>180</u> / <u>100</u> | 1.3        | 338                | 170                | 52000                               | 5.04  | 2015               | 23       | None                        | RBC, PLT, Eclampsia     | FGR                  |
| H9  | 36       | White | 23       | 29.3 | 0   | <u>166</u> / <u>98</u>  | 0.6        | 243                | 181                | 42000                               | 12.35 | 581                | 23       | None                        | PLT                     | FGR                  |
| H10 | 32.1     | Black | 15       | 16.3 | 0   | <u>230</u> / <u>110</u> | 0.6        | 114                | 81                 | 42000                               | N/A   | 612                | 11       | NS                          | RBC                     | None                 |
| H11 | 34.2     | Black | 19       | 24   | 0   | <u>191</u> / <u>84</u>  | 0.6        | 201                | 101                | 63000                               | 6.93  | 325                | 10       | None                        | None                    | None                 |
| H12 | 22.2     | Black | 45       | 33.7 | >2  | <u>155</u> / <u>90</u>  | 0.7        | 131                | 125                | 68000                               | 9.77  | 503                | 0        | None                        | None                    | FGR Termination      |
| H13 | 37.2     | White | 27       | 36.2 | 0   | <u>180</u> / <u>91</u>  | 0.6        | 695                | 423                | 19000                               | 0.19  | 805                | 0        | NS                          | PLT                     | None                 |

EGA = estimated gestational age, wk = weeks, yr = years, BMI = body mass index, BP = blood pressure, P = parity, SBP (mmHg) = systolic blood pressure, DBP (mmHg) = diastolic blood pressure, Cr = creatinine, AST = aspartate aminotransferase, ALT = alanine aminotransferase, Pr/Cr = protein creatinine ratio, LDH = lactate dehydrogenase, mHam = modified Ham (positive for modified Ham > 20.5%), FGR = fetal growth restriction, MV = mechanical ventilation, RRT = renal replacement therapy, NS = not sequenced, RBC = red blood cell transfusion, PLT = platelet transfusion, \* history of prior HELLP syndrome or eclampsia in previous pregnancy.

**Table 2: Partial HELLP syndrome participants**

| ID   | EGA (wk) | Race  | Age (yr) | BMI  | P    | SBP/DBP                 | Cr (mg/dL) | Highest AST (IU/L) | Highest ALT (IU/L) | Lowest Platelets (mm3) | Pr/Cr | Highest LDH (IU/L) | mHAM (%) | Germline Variant                                     | Adverse Maternal Events | Adverse Fetal Events |
|------|----------|-------|----------|------|------|-------------------------|------------|--------------------|--------------------|------------------------|-------|--------------------|----------|------------------------------------------------------|-------------------------|----------------------|
| pH1  | 32.4     | Black | 24       | 25.2 | > 1* | <u>169</u> / <u>98</u>  | 0.6        | 99                 | 14                 | 176000                 | 0.67  | N/A                | 7        | C3 p.P890H, CFI p.I416L, del(CFHR3-CFHR1) homozygous | None                    | FGR                  |
| pH2  | 30.6     | Black | 25       | 32.7 | > 2  | <u>180</u> / <u>123</u> | 2.0        | 51                 | 45                 | 106000                 | 6.43  | 492                | 6        | C3 p.D1457H, del(CFHR3-CFHR1) homozygous             | None                    | None                 |
| pH3  | 34       | Black | 29       | 35.5 | 0    | <u>176</u> / <u>91</u>  | 1.0        | 72                 | 72                 | 164000                 | 12.2  | 430                | 4        | del(CFHR3-CFHR1) homozygous                          | None                    | FGR                  |
| pH4  | 27       | White | 36       | 41.7 | 0    | <u>200</u> / <u>80</u>  | 0.7        | 78                 | 78                 | 293000                 | 1.52  | 529                | 37       | None                                                 | None                    | None                 |
| pH5  | 30.4     | Asian | 26       | 27.1 | 0    | <u>190</u> / <u>110</u> | 0.5        | 55                 | 66                 | 176000                 | 0.59  | 184                | 27       | None                                                 | None                    | FGR                  |
| pH6  | 28.1     | Black | 25       | 32.4 | >1   | <u>173</u> / <u>103</u> | 0.7        | 93                 | 90                 | 130000                 | 3.00  | 554                | 22       | None                                                 | Eclampsia               | FGR                  |
| pH7  | 37.5     | White | 41       | 34   | 0    | <u>157</u> / <u>100</u> | 0.8        | 65                 | 89                 | 140000                 | 0.13  | 161                | 20       | None                                                 | None                    | None                 |
| pH8  | 37.5     | Black | 30       | 42.3 | >2   | <u>171</u> / <u>90</u>  | 1.1        | 792                | 841                | 294000                 | 0.45  | 1124               | 18       | None                                                 | None                    | None                 |
| pH9  | 39.2     | Black | 34       | 52.4 | 0    | <u>183</u> / <u>84</u>  | 0.9        | 134                | 74                 | 237000                 | 0.63  | 284                | 12       | None                                                 | None                    | None                 |
| pH10 | 37.2     | Black | 29       | 39.1 | 0    | <u>194</u> / <u>106</u> | 0.8        | 28                 | 23                 | 222000                 | 0.35  | 434                | 11       | None                                                 | None                    | None                 |
| pH11 | 31.2     | White | 31       | 19.6 | 0    | <u>165</u> / <u>71</u>  | 0.6        | 22                 | 22                 | 84000                  | 0.86  | 228                | 6        | None                                                 | None                    | None                 |
| pH12 | 32.6     | White | 33       | 28.4 | >1   | <u>145</u> / <u>77</u>  | 1.1        | 181                | 189                | 316000                 | 6.23  | 222                | 3        | None                                                 | None                    | None                 |
| pH13 | 39.3     | Black | 30       | 35.5 | > 1  | <u>180</u> / <u>103</u> | 1          | 76                 | 88                 | 249000                 | 0.20  | 480                | 3        | None                                                 | None                    | None                 |
| pH14 | 34.4     | Asian | 27       | 27.2 | 0    | <u>158</u> / <u>97</u>  | 0.6        | 69                 | 91                 | 261000                 | 8.71  | 317                | 0        | None                                                 | None                    | None                 |

EGA = estimated gestational age, wk = weeks, yr = years, BMI = body mass index, BP = blood pressure, P = parity, SBP (mmHg) = systolic blood pressure, DBP (mmHg) = diastolic blood pressure, Cr = creatinine, AST = aspartate aminotransferase, ALT = alanine aminotransferase, Pr/Cr = protein creatinine ratio, LDH = lactate dehydrogenase, mHam = modified Ham (positive for modified Ham > 20.5%), FGR = fetal growth restriction. \* history of prior HELLP syndrome or eclampsia in previous pregnancy.

**Table 3: Healthy pregnant control (HPC) participants**

| ID    | EGA  | Race  | Age | BMI   | P   | SBP<br>DBP        | mHam<br>(%) | germline Variant                         | Adverse<br>Maternal<br>Events | Adverse<br>Fetal<br>Events |
|-------|------|-------|-----|-------|-----|-------------------|-------------|------------------------------------------|-------------------------------|----------------------------|
| HPC*  | 37.3 | Black | 34  | 36.6  | > 1 | <u>128</u><br>71  | 8           | CFH p.H371N, CFHR5 p.S78P, CFHR5 p.Y279N | None                          | None                       |
| HPC2  | 38   | Black | 27  | 29.8  | 0   | <u>128</u><br>85  | 4           | CFHR3 p.C15Y                             | None                          | None                       |
| HPC3  | 38.1 | White | 31  | 26.7  | > 1 | <u>122</u><br>76  | 100         | None                                     | None                          | None                       |
| HPC4  | 40   | White | 34  | 26.6  | > 1 | <u>115</u><br>74  | 50          | None                                     | None                          | None                       |
| HPC5  | 39.1 | Other | 32  | 37.6  | > 3 | <u>124</u><br>83  | 16          | None                                     | None                          | None                       |
| HPC6  | 39   | Asian | 36  | 25.4  | > 2 | <u>105</u><br>64  | 15          | None                                     | None                          | None                       |
| HPC7  | 38   | White | 35  | 35.1  | 0   | <u>170</u><br>100 | 14          | None                                     | Preeclampsia                  | None                       |
| HPC8  | 38   | Black | 38  | 28.6  | > 1 | <u>121</u><br>87  | 13          | None                                     | None                          | None                       |
| HPC9  | 37.1 | White | 35  | 22.8  | > 1 | <u>119</u><br>67  | 12          | None                                     | None                          | None                       |
| HPC10 | 36   | Black | 32  | 32    | > 3 | <u>116</u><br>61  | 9           | None                                     | None                          | None                       |
| HPC11 | 34.1 | White | 32  | 27.5  | 0   | <u>131</u><br>76  | 7           | None                                     | None                          | None                       |
| HPC12 | 38.3 | Black | 20  | 27.7  | > 1 | <u>106</u><br>58  | 7           | None                                     | None                          | None                       |
| HPC13 | 36.3 | Asian | 36  | 30.16 | > 1 | <u>93</u><br>53   | 6           | None                                     | None                          | None                       |
| HPC14 | 37   | Black | 31  | 40.8  | >3  | <u>133</u><br>62  | 5           | None                                     | None                          | None                       |
| HPC15 | 39.3 | White | 37  | 28.1  | 0   | <u>121</u><br>84  | 5           | NS                                       | None                          | None                       |
| HPC16 | 36.2 | White | 30  | 27.6  | > 2 | <u>127</u><br>76  | 3           | None                                     | None                          | None                       |
| HPC17 | 38.6 | White | 33  | 28.6  | 0   | <u>118</u><br>75  | 3           | NS                                       | None                          | None                       |
| HPC18 | 37   | White | 36  | 20.5  | 0   | <u>135</u><br>85  | 1           | None                                     | None                          | None                       |
| HPC19 | 38   | White | 28  | 37.7  | >1  | <u>110</u><br>73  | N/A         | None                                     | None                          | FGR                        |

\* history of sickle cell trait, EGA = estimated gestational age, wk = weeks, yr = years, BMI = body mass index, BP = blood pressure, P = parity, SBP (mmHg) = systolic blood pressure, DBP (mmHg) = diastolic blood pressure, mHam = modified Ham (positive for modified Ham > 20.5%), FGR = fetal growth restriction, NS = not sequenced.

**Table 4: aHUS and TTP participants**

| ID     | Race  | Age (yr) | Cr (mg/dL) | Highest AST (IU/L) | Highest ALT (IU/L) | Lowest Platelets (mm3) | Highest LDH (IU/L) | mHAM (%) | ADAMTS13 (%) | Germline Variant                   |
|--------|-------|----------|------------|--------------------|--------------------|------------------------|--------------------|----------|--------------|------------------------------------|
| TTP1   | White | 38       | 0.87       | 61                 | 37                 | 7                      | 1081               | 23       | <5           | None                               |
| TTP2   | Other | 27       | 1.6        | 25                 | 23                 | 25                     | 1455               | 21       | <5           | None                               |
| TTP3   | Black | 32       | 2.3        | 473                | 187                | 4                      | 2215               | 17       | <5           | None                               |
| TTP4   | Black | 43       | 1.3        | 58                 | 41                 | 4                      | 1985               | 16       | <5           | None                               |
| TTP5   | Black | 56       | 0.9        | 51                 | 20                 | 7                      | 1081               | 8        | <5           | None                               |
| TTP6   | Black | 39       | 1.4        | 39                 | 22                 | 5                      | 825                | 5        | <5           | None                               |
| TTP7   | Black | 60       | 1.9        | 30                 | 27                 | 9                      | 2337               | 5        | <10          | None                               |
| TTP8   | Black | 64       | 1.2        | 53                 | 13                 | 10                     | 1482               | n/a      | <5           | None                               |
| aHUS1  | Black | 47       | 4.3        | 28                 | 22                 | 17                     | 1718               | 63       | 88           | CFB p.I242L, del(CFHR1) homozygous |
| aHUS2  | Black | 23       | 3.7        | 273                | 591                | 8                      | 2024               | 49       | 54           | del(CFHR1-CFHR3) homozygous        |
| aHUS3  | White | 32       | n/a        | n/a                | n/a                | n/a                    | n/a                | 42       | n/a          | CFHR3 p.G117V                      |
| aHUS4  | Black | 38       | 6.1        | 47                 | 20                 | 63                     | 917                | 39       | >100         | CFH p.V158I, CFH p.A1027P          |
| aHUS5  | White | 38       | 3.48       | 93                 | 52                 | 45                     | 2501               | 39       | >100         | THBD p.A43T                        |
| aHUS6  | White | 32       | 6.5        | 26                 | 15                 | 76                     | 495                | 28       | 96           | CD46 p.W216C                       |
| aHUS7  | Asian | 32       | 7.2        | 109                | 106                | 7                      | 1588               | 28       | 41           | CFHR5 p.P453A                      |
| aHUS8  | White | 25       | n/a        | n/a                | n/a                | n/a                    | n/a                | 27       | n/a          | CFH p.R1078S                       |
| aHUS9  | White | 78       | 4          | 86                 | 32                 | 47                     | 1473               | 26       | 53           | del(CFHR1-CFHR3) homozygous        |
| aHUS10 | White | 51       | 3.7        | 63                 | 20                 | 18                     | 5266               | 25       | >100         | CFH p.R1074P, CD46 p.S274YFS*11    |
| aHUS11 | White | 22       | 8.2        | 68                 | 117                | 62                     | 2820               | 49       | 100          | None                               |
| aHUS12 | White | 22       | 4.3        | n/a                | n/a                | 85                     | 471                | 36       | 28           | None                               |
| aHUS13 | Black | 24       | 14.9       | 22                 | 13                 | 77                     | 649                | 36       | 55           | None                               |
| aHUS14 | White | 50       | 6.3        | 55                 | 54                 | 76                     | 903                | 27       | 40           | None                               |
| aHUS15 | White | 73       | 1.2        | 151                | 150                | 21                     | 733                | 24       | 96           | None                               |
| aHUS16 | White | 25       | 1.4        | 46                 | 18                 | 20                     | 1160               | 10       | 82           | None                               |
| aHUS17 | White | 61       | 1.6        | 75                 | 85                 | 21                     | 549                | 9        | 87           | None                               |
| aHUS18 | White | 17       | n/a        | n/a                | n/a                | n/a                    | n/a                | n/a      | 34           | None                               |

aHUS = atypical hemolytic uremic syndrome, TTP = thrombotic thrombocytopenia purpura, yr = years, Cr = creatinine, AST = aspartate aminotransferase, ALT = alanine aminotransferase, LDH = lactate dehydrogenase, mHam = modified Ham,

| <b>Table 5: Comparison of mHam for all groups</b> |                     |                     |                          |                     |                     |                |
|---------------------------------------------------|---------------------|---------------------|--------------------------|---------------------|---------------------|----------------|
| <b>Participant Group</b>                          | <b>(+) mHam (%)</b> | <b>(-) mHam (%)</b> | <b>Participant Group</b> | <b>(+) mHam (%)</b> | <b>(-) mHam (%)</b> | <b>p-value</b> |
| <b>HELLP Syndrome</b>                             | 8 (62%)             | 5 (38%)             | <b>HPC</b>               | 2 (11%)             | 16 (89%)            | 0.006          |
| <b>HELLP Syndrome</b>                             | 8 (62%)             | 5 (38%)             | <b>HPC+TTP</b>           | 4 (16%)             | 21 (84%)            | 0.009          |
| <b>aHUS</b>                                       | 15 (88%)            | 2 (12%)             | <b>HPC+TTP</b>           | 4 (16%)             | 21 (84%)            | <0.001         |
| <b>HELLP Syndrome</b>                             | 8 (62%)             | 5 (38%)             | <b>aHUS</b>              | 15 (88%)            | 2 (12%)             | 0.19           |

mHam = modified Ham assay, aHUS = atypical hemolytic uremic syndrome, HPC = healthy pregnant control, TTP = thrombotic thrombocytopenia purpura.

| <b>Table 6: Comparison of germline mutation status for all groups</b> |                         |                         |                          |                         |                         |                |
|-----------------------------------------------------------------------|-------------------------|-------------------------|--------------------------|-------------------------|-------------------------|----------------|
| <b>Participant Group</b>                                              | <b>(+) mutation (%)</b> | <b>(-) mutation (%)</b> | <b>Participant Group</b> | <b>(+) mutation (%)</b> | <b>(-) mutation (%)</b> | <b>p-value</b> |
| <b>HELLP Syndrome</b>                                                 | 5 (46%)                 | 6 (54%)                 | <b>HPC</b>               | 2 (12%)                 | 15 (88%)                | 0.07           |
| <b>HELLP Syndrome</b>                                                 | 5 (46%)                 | 6 (54%)                 | <b>HPC+TTP</b>           | 2 (8%)                  | 23 (92%)                | 0.01           |
| <b>aHUS</b>                                                           | 10 (56%)                | 8 (44%)                 | <b>HPC+TTP</b>           | 2 (8%)                  | 23 (92%)                | 0.001          |
| <b>HELLP Syndrome</b>                                                 | 5 (46%)                 | 6 (54%)                 | <b>aHUS</b>              | 10 (56%)                | 8 (44%)                 | 0.12           |

mutation = rare germline variant in a gene of the alternative pathway of complement, aHUS = atypical hemolytic uremic syndrome, HPC = healthy pregnant control, TTP = thrombotic thrombocytopenia purpura.

**Table 7: Germline variant characteristics**

| ID     | Gene  | Nucleotide Variant                                    | Chr | Coordinate | VAF | Read Depth | Protein Position | MAF (ExAC)  | Sift        | PolyPhen          | Provean     |
|--------|-------|-------------------------------------------------------|-----|------------|-----|------------|------------------|-------------|-------------|-------------------|-------------|
| H3     | C3    | C>C/T                                                 | 19  | 6710711    | 56  | 208        | G542D            | 0.00001682  | tolerated   | possibly damaging | deleterious |
| pH1    | C3    | G>G/T                                                 | 19  | 6697482    | 48  | 297        | P890H            | 0.00002471  | tolerated   | benign            | deleterious |
| pH1    | CFI   | T>T/G                                                 | 4   | 110667561  | 44  | 424        | I416L            | 0.001113    | deleterious | benign            | neutral     |
| H4     | CFHR5 | GGAAATTTGAATATCCTATATGT><br>GGAAATTTGAATATCCTATATGT/G | 1   | 196977785  | 40  | 609        | K562Nfs*24       | N/A         | N/A         | N/A               | N/A         |
| pH3    | C3    | C>C/G                                                 | 19  | 6680256    | 44  | 393        | D1457H           | 0.0003626   | deleterious | probably damaging | deleterious |
| H2     | CFHR1 | CT>CT/C                                               | 1   | 196801100  | 59  | 711        | L322Rfs*50       | N/A         | N/A         | N/A               | N/A         |
| HPC2   | CFHR3 | G>G/A                                                 | 1   | 196744060  | 50  | 277        | C15Y             | N/A         | deleterious | benign            | deleterious |
| HPC1   | CFH   | C>C/A                                                 | 1   | 196658696  | 49  | 440        | H371N            | 0.00007426  | tolerated   | benign            | deleterious |
| HPC1   | CFHR5 | T>T/C                                                 | 1   | 196952188  | 46  | 725        | S78P             | 0.0001401   | deleterious | probably damaging | deleterious |
| HPC1   | CFHR5 | T>T/A                                                 | 1   | 196965196  | 47  | 554        | Y279N            | 0.0001484   | tolerated   | benign            | deleterious |
| aHUS4  | CFH   | G>G/A                                                 | 1   | 196646650  | 59  | 191        | V158I,           | 0.000132    | tolerated   | benign            | neutral     |
| aHUS4  | CFH   | G>G/C                                                 | 1   | 196711127  | 44  | 369        | A1027P           | 0.00004119  | tolerated   | benign            | neutral     |
| aHUS1  | CFB   | A>A/C                                                 | 6   | 31915584   | 50  | 567        | I242L            | 0.00002559  | tolerated   | benign            | neutral     |
| aHUS3  | CFHR3 | G>G/T                                                 | 1   | 196749023  | 55  | 190        | G117V            | N/A         | deleterious | probably damaging | deleterious |
| aHUS5  | THBD  | C>C/T                                                 | 20  | 23030015   | 59  | 87         | A43T             | 0.00343     | tolerated   | benign            | neutral     |
| aHUS10 | CFH   | G>G/C                                                 | 1   | 196712669  | 49  | 508        | R1074P           | 0.00001647  | deleterious | probably damaging | deleterious |
| aHUS10 | CD46  | CAG>C                                                 | 1   | 207940331  | 25* | 8*         | S274YFS*11       | N/A         | N/A         | N/A               | N/A         |
| aHUS6  | CD46  | G>G/C                                                 | 1   | 207934766  | 50  | 701        | W216C            | N/A         | deleterious | probably damaging | deleterious |
| aHUS8  | CFH   | G>G/T                                                 | 1   | 196712682  | 51  | 332        | R1078S           | 0.00005765  | tolerated   | benign            | neutral     |
| aHUS7  | CFHR5 | C>C/G                                                 | 1   | 196973817  | 47  | 220        | P453A            | 0.000008238 | deleterious | probably damaging | deleterious |

\* This variant did not meet our filtering criteria, however has been previously reported (39) and verified via CLIA laboratory testing. Chr = chromosome, VAF = variant allele frequency, MAF = minor allele frequency as reported in the ExAC database.

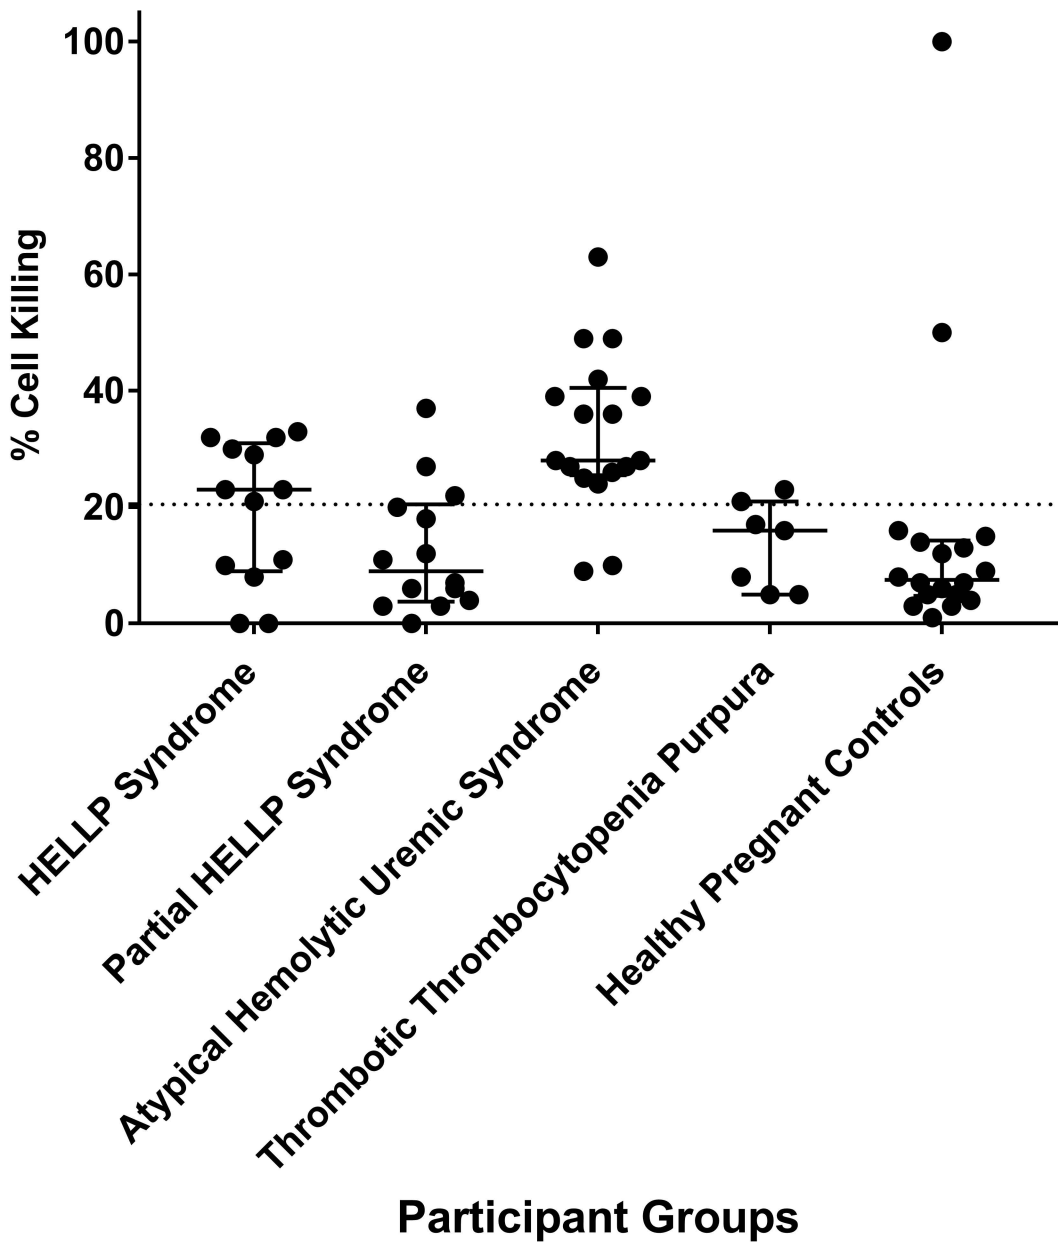

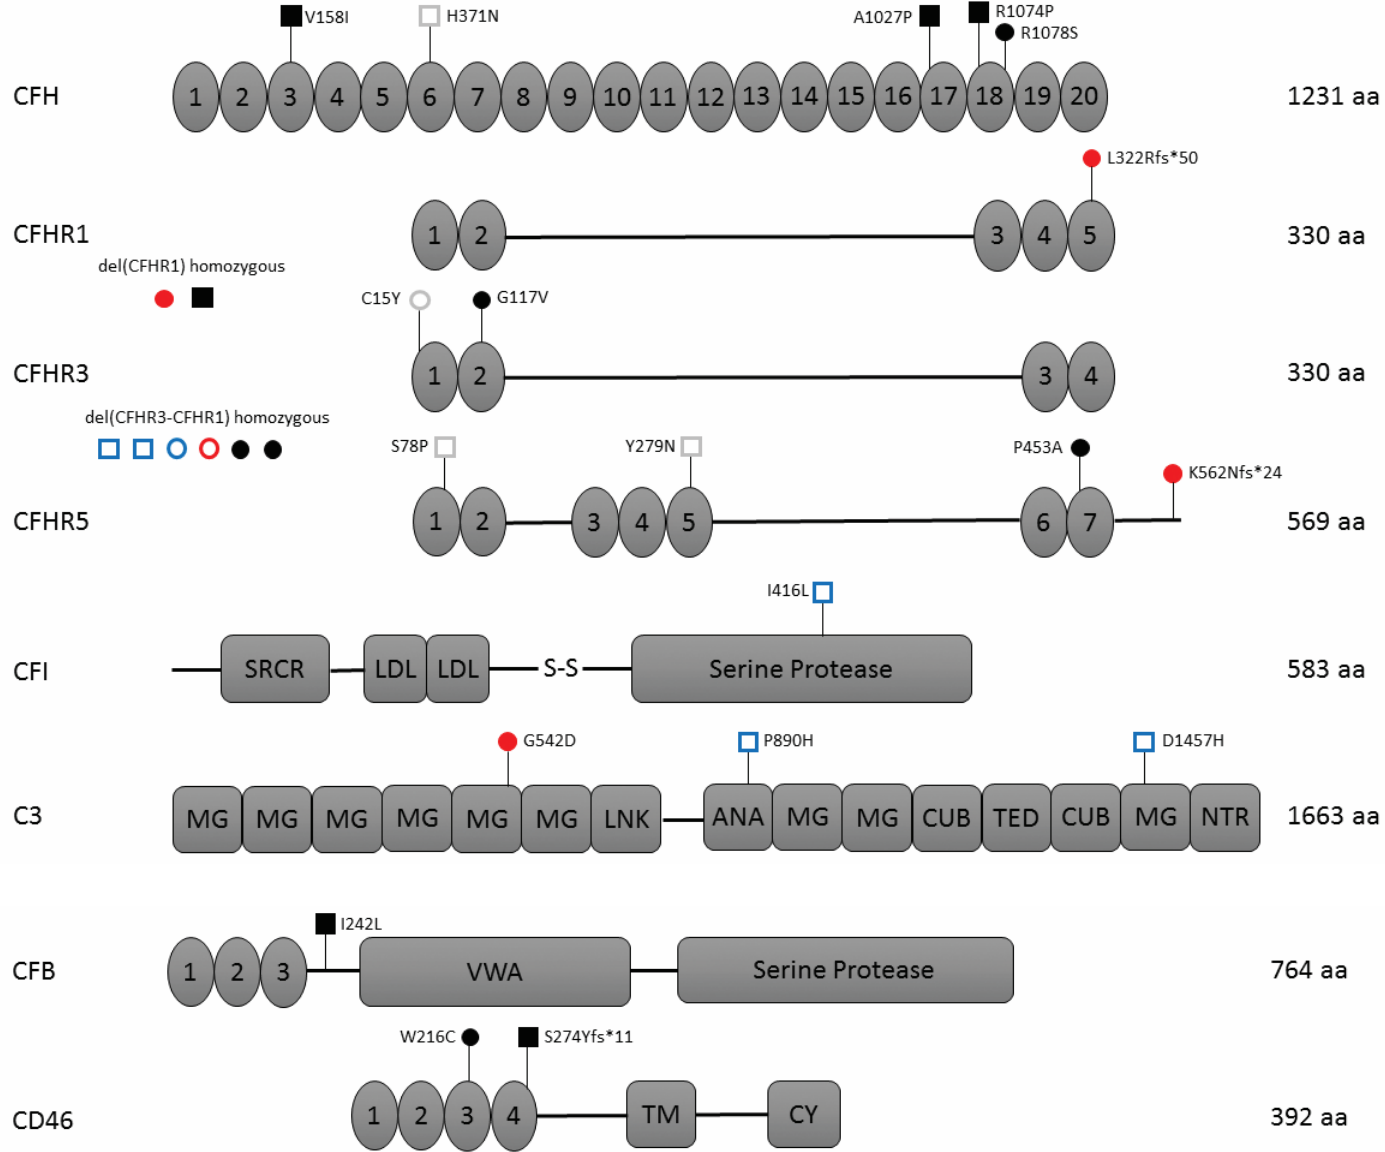

| Legend |                  |
|--------|------------------|
| ●      | aHUS             |
| ●      | HELLP            |
| ●      | partial HELLP    |
| ●      | pregnant control |



STROBE Statement—Checklist of items that should be included in reports of *cohort studies*

|                              | <b>Item No</b> | <b>Recommendation</b>                                                                                                                                                                                                                                                                                                  |
|------------------------------|----------------|------------------------------------------------------------------------------------------------------------------------------------------------------------------------------------------------------------------------------------------------------------------------------------------------------------------------|
| <b>Title and abstract</b>    | 1              | (a) Indicate the study’s design with a commonly used term in the title or the abstract<br>(b) Provide in the abstract an informative and balanced summary of what was done and what was found                                                                                                                          |
| <b>Introduction</b>          |                |                                                                                                                                                                                                                                                                                                                        |
| Background/rationale         | 2              | Explain the scientific background and rationale for the investigation being reported                                                                                                                                                                                                                                   |
| Objectives                   | 3              | State specific objectives, including any prespecified hypotheses                                                                                                                                                                                                                                                       |
| <b>Methods</b>               |                |                                                                                                                                                                                                                                                                                                                        |
| Study design                 | 4              | Present key elements of study design early in the paper                                                                                                                                                                                                                                                                |
| Setting                      | 5              | Describe the setting, locations, and relevant dates, including periods of recruitment, exposure, follow-up, and data collection                                                                                                                                                                                        |
| Participants                 | 6              | (a) Give the eligibility criteria, and the sources and methods of selection of participants. Describe methods of follow-up<br>(b) For matched studies, give matching criteria and number of exposed and unexposed                                                                                                      |
| Variables                    | 7              | Clearly define all outcomes, exposures, predictors, potential confounders, and effect modifiers. Give diagnostic criteria, if applicable                                                                                                                                                                               |
| Data sources/<br>measurement | 8*             | For each variable of interest, give sources of data and details of methods of assessment (measurement). Describe comparability of assessment methods if there is more than one group                                                                                                                                   |
| Bias                         | 9              | Describe any efforts to address potential sources of bias                                                                                                                                                                                                                                                              |
| Study size                   | 10             | Explain how the study size was arrived at                                                                                                                                                                                                                                                                              |
| Quantitative variables       | 11             | Explain how quantitative variables were handled in the analyses. If applicable, describe which groupings were chosen and why                                                                                                                                                                                           |
| Statistical methods          | 12             | (a) Describe all statistical methods, including those used to control for confounding<br>(b) Describe any methods used to examine subgroups and interactions<br>(c) Explain how missing data were addressed<br>(d) If applicable, explain how loss to follow-up was addressed<br>(e) Describe any sensitivity analyses |
| <b>Results</b>               |                |                                                                                                                                                                                                                                                                                                                        |
| Participants                 | 13*            | (a) Report numbers of individuals at each stage of study—eg numbers potentially eligible, examined for eligibility, confirmed eligible, included in the study, completing follow-up, and analysed<br>(b) Give reasons for non-participation at each stage<br>(c) Consider use of a flow diagram                        |
| Descriptive data             | 14*            | (a) Give characteristics of study participants (eg demographic, clinical, social) and information on exposures and potential confounders<br>(b) Indicate number of participants with missing data for each variable of interest<br>(c) Summarise follow-up time (eg, average and total amount)                         |
| Outcome data                 | 15*            | Report numbers of outcome events or summary measures over time                                                                                                                                                                                                                                                         |
| Main results                 | 16             | (a) Give unadjusted estimates and, if applicable, confounder-adjusted estimates and their precision (eg, 95% confidence interval). Make clear which confounders were adjusted for and why they were included                                                                                                           |

|                          |    |                                                                                                                                                                            |
|--------------------------|----|----------------------------------------------------------------------------------------------------------------------------------------------------------------------------|
|                          |    | (b) Report category boundaries when continuous variables were categorized                                                                                                  |
|                          |    | (c) If relevant, consider translating estimates of relative risk into absolute risk for a meaningful time period                                                           |
| Other analyses           | 17 | Report other analyses done—eg analyses of subgroups and interactions, and sensitivity analyses                                                                             |
| <b>Discussion</b>        |    |                                                                                                                                                                            |
| Key results              | 18 | Summarise key results with reference to study objectives                                                                                                                   |
| Limitations              | 19 | Discuss limitations of the study, taking into account sources of potential bias or imprecision. Discuss both direction and magnitude of any potential bias                 |
| Interpretation           | 20 | Give a cautious overall interpretation of results considering objectives, limitations, multiplicity of analyses, results from similar studies, and other relevant evidence |
| Generalisability         | 21 | Discuss the generalisability (external validity) of the study results                                                                                                      |
| <b>Other information</b> |    |                                                                                                                                                                            |
| Funding                  | 22 | Give the source of funding and the role of the funders for the present study and, if applicable, for the original study on which the present article is based              |

\*Give information separately for exposed and unexposed groups.

**Note:** An Explanation and Elaboration article discusses each checklist item and gives methodological background and published examples of transparent reporting. The STROBE checklist is best used in conjunction with this article (freely available on the Web sites of PLoS Medicine at <http://www.plosmedicine.org/>, Annals of Internal Medicine at <http://www.annals.org/>, and Epidemiology at <http://www.epidem.com/>). Information on the STROBE Initiative is available at <http://www.strobe-statement.org>.
